# Supplementary material
Source: PubMed Central journal article supplement (PMC10308303)
Supplement: jamapsychiatry-e231958-s001.pdf [file jamapsychiatry-e231958-s001.pdf]

## Supplementary Online Content

Zhu Y, He C, Bell M, et al. Association of ambient temperature with the prevalence of intimate partner violence among partnered women in low- and middle-income South Asian countries. Published online June 28, 2023. *JAMA Psychiatry*. doi:10.1001/jamapsychiatry.2023.1958

### **eAppendix.**

**eFigure 1.** Diagram of data preparations

**eTable 1.** List of DHS survey included in the analysis.

**eTable 2.** Summary characteristics for the study population and those suffering from intimate partner violence (IPV) in different types

**eTable 3.** Summary characteristics for the samples in original database and the samples included in final analysis

**eTable 4.** Summary statistics for annual-mean temperatures and IPV prevalence in different types during 2010-2018 in 3 South Asian countries

**eTable 5.** Spearman correlation coefficient of individual and household variables

**eFigure 2.** Exposure–response curves for the associations between annual temperature and prevalence of IPV in South Asia, classified by IPV types and countries

**eTable 6.** Summary of p-value for F test to examine linearity of the E-R curves

**eTable 7.** Odds ratios (95% confidence intervals) of IPV prevalence per 1°C increment in annual temperature in models of sensitivity analyses

**eTable 8.** R<sup>2</sup> of models using annual temperature and average temperature of the hottest 3 consecutive months in the past year in sensitivity analyses

**eFigure 3.** Projected changes in annual mean temperature from the baseline period (1985-2014) under different climate scenarios in 3 South Asian countries

**eTable 9.** Summary statistics of the projected annual temperature under the SSP1-2.6, SSP2-4.5 and SSP5-8.5 scenarios in the 2010s, 2030s, 2050s, 2070s and 2090s

**eTable 10.** Projected percentage change of IPV prevalence attributable to climate warming comparing specific decades to the baseline period (1985-2014) in 3 South Asian countries, by country, period, and climate change scenario, under the assumption of no change in population size and structure

**eTable 11.** Projected percentage change of physical violence, sexual violence and emotional violence prevalence in 3 South Asian countries from the baseline period (1985-2014) under the SSP1-2.6, SSP2-4.5 and SSP5-8.5 scenarios in the 2010s, 2030s, 2050s, 2070s and 2090s, under the assumption of no change in population

**eFigure 4.** Projected percentage changes in IPV prevalence attributable to climate warming from the baseline period (1985-2014) in 3 South Asian countries under different climate scenarios, under the assumption of no change in population

**eFigure 5.** Excess IPV cases attributable to climate warming from the baseline period (1985-2014) in 3 South Asian countries under different climate scenarios, under the assumption of no change in population size and structure

**eTable 12.** Projected percentage change of IPV prevalence attributable to climate warming comparing specific decades to the baseline period (1985-2014) in 3 South Asian countries, by country, period, and climate change scenario, considering population changes based on the corresponding SSP assumption

**eTable 13.** Projected percentage change of physical violence, sexual violence and emotional violence prevalence in 3 South Asian countries from the baseline period (1985-2014) under the SSP1-2.6, SSP2-4.5 and SSP5-8.5 scenarios in the 2010s, 2030s, 2050s, 2070s and 2090s, considering population changes based on the corresponding SSP assumption

**eFigure 6.** Projected percentage changes in IPV prevalence attributable to climate warming from the baseline period (1985-2014) in 3 South Asian countries under different climate scenarios, considering population changes based on the corresponding SSP assumption

**eFigure 7.** Excess IPV cases attributable to climate warming from the baseline period (1985-2014) in 3 South Asian countries under different climate

scenarios, considering population changes based on the corresponding SSP assumption

## **eReferences**

This supplementary material has been provided by the authors to give readers additional information about their work.

## **eAppendix**

### **Method**

#### **1. Data sources**

Supported by the US Agency for International Development (USAID), the DHS program routinely collected (about 3 to 5 year intervals) health, behavior and sociodemographic data in more than 90 low- and middle-income countries (LMICs), covering a series of topics such as maternal and child health, malaria, domestic violence, environmental health.<sup>1</sup> The surveys utilized a stratified two-stage cluster sampling design. In the first stage, a stratified sample of cluster was selected with probability proportional to size. In each stratum, a sample of a predetermined number in clusters was selected independently with probability proportional to the cluster's measure of size. The listing procedure was performed in each selected cluster, in which all dwellings/households were listed. In the second stage, a fixed (or variable) number of households was selected from the selected clusters using equal probability systematic sampling. In each selected household, all ever-married women of reproductive age 15–49 were interviewed by trained fieldwork staff. In general, clusters were randomly selected from the areas stratified by geographic region and urban/rural area within each region, while the households were randomly selected from each cluster.<sup>2</sup> The proportions of various characteristics in original database and the samples included were similar, indicating that the included data are representative without potential sampling bias ([eTable 2 in Supplement 1](#))

We included the following characteristics of women and their household from the DHS database: age, education, residence type, partners' age, partners' education, marital status, roof materials, and floor materials. Using linear principal component analysis, household wealth index scores were calculated from a range of household's assets.<sup>3</sup> Based on the household wealth index, households were classified into five groups from poorest to richest, including the poorest, poorer, middle, richer, and richest.

## **2. Outcome measurements**

The main outcome variables in this analysis were past year experience of intimate partner violence (IPV), including physical, emotional and sexual violence. The primary outcomes were all self-reported. The specific questions used to assess the violence variables (physical, emotional and sexual) include:

- Physical violence: the respondents were asked whether they ever experience the following 7 behaviors from her husband or partner: push you, shake you or throw something to you; slap you; punch you with fist or hit you with something harmful; kick or drag you; strangle or burn you; threaten you with a knife, gun or other weapons; and twist your arm or pull your hair.
- Sexual violence: the respondents were asked whether they ever experience the following 3 behaviors from her husband or partner: physically force you into unwanted sex; forced you into other unwanted sexual acts; and physically force you to perform sexual acts you did not want to.
- Emotional violence: the respondents were asked whether she ever experiences the following 3 behaviors from her husband or partner: humiliate you; threaten to harm you; and insulted or made you feel bad.

According to the Guide to DHS Statistics,<sup>4</sup> the response options of the questions about IPV experience were ‘never’, ‘often’, ‘sometimes’ and ‘yes, but not in the last 12 months’. “IPV experience in the past year” were included in the analysis as a binary variable (1 represents “experience IPV in the past 12 months”, including the options of ‘often’ and ‘sometimes’; 0 represents “did not experience IPV in the past 12 months”, including the options of ‘never’ and the options ‘yes, but not in the last 12 months’).

## **3. Covariate**

The associations were adjusted for the following personal or household factors on individual level: age (15-20 years, 21-30 years, 31-40 years and 41-49 years), educational level (no education, primary, secondary and higher), residence type (urban

and rural), partner's age (15-20 years, 21-30 years, 31-40 years, 41-50 years and >50 years), partner's educational level (no education, primary, secondary and higher), marital status (married, living with partner, widowed, divorced and separated), floor material (natural, rudimentary, finished and others), roof material (natural, rudimentary, finished and others), and household wealth status poorest, poorer, middle, richer and richest. We matched each woman's household to the population and GDP per capita data of the corresponding grid, and controlled for the local population density and GDP per capita. To account enough for location-specific factors and better isolate the temperature effect, we further included random effects for cluster in the main model. Finally, the model was adjusted for annual cumulative precipitation at the individual cluster for the past 12 months.

#### ***4. Scenarios of future climate change***

Future time series data of daily mean temperature for various climate change scenarios were derived from the latest internationally-coordinated Coupled Model Intercomparison Project sixth phase (CMIP6).<sup>5</sup> The projections of global climate change were assessed combining the Representative Concentration Pathway (RCP) and the Shared Socioeconomic Pathways (SSPs). RCPs are the trajectories of greenhouse gas concentrations used for climate modelling, while SSPs are the scenarios of projected socioeconomic global changes up to 2100.<sup>5</sup> The combined trajectories include five common scenarios (i.e., SSP1-1.9, SSP1-2.6, SSP2-4.5, SSP3-7.0, and SSP5-8.5) correspond to the increasing trajectories of atmospheric greenhouse gas concentration, and characterize a range of warming in global climate, from mild (SSP1-1.9) to extreme (SSP5-8.5). We selected 3 most common scenarios and the baseline period (1985–2014) in accordance with previous projection studies.<sup>6,7</sup> Compared to the baseline period, global surface air temperature is likely to increase by 2.4°C–4.8°C in the high-emission scenario (SSP5-8.5) over the period 2081–2100, 0.5°C to 1.5°C for the low emission scenario (SSP1-2.6), and 1.2°C to 2.6°C for the moderate emission scenario (SSP2-

© 2023 American Medical Association. All rights reserved.

4.5).<sup>5</sup> Finally, we extracted daily temperature data from 10 global climate models (GCMs) datasets during the baseline period and the projection period (2015–2099) for historical and future temperature simulation across various climate change scenarios.

We performed a bilinear interpolation on each GCM output to statistically estimate the temperature data for a geographical grid of  $1.0^\circ \times 1.0^\circ$  resolution. The gridded database was converted into the city level by aggregating the data from all grid cells within the boundary of cities. We defined cities and their boundaries based on based on the administrative boundaries at Level 2 in Database of Global Administrative Areas Version 4.1 (<https://gadm.org/>).<sup>8</sup> The projected temperature data obtained from various climate models may cause non-negligible bias when used to fit the exposure-response (E-R) association quantified by ERA-5 temperature data. Therefore, the gridded temperature data for each climate model in 1985-2099 were bias-corrected by the historical data of corresponding grids over the DHS study period from the ERA-5 database with an additive scaling method.<sup>9</sup>

## ***5. Future population data***

We obtained predicted gridded population size data under the SSP1 (Sustainability), SSP2 (Middle of the Road) and SSP5 (Fossil-fueled development) scenarios from National Aeronautics and Space Administration (NASA) Socioeconomic Data and Applications Center (SEDAC).<sup>10</sup> The database provides global urban, rural, and total population base year and projection grids at a resolution of 1-km (about 30 arc-seconds) based on the SSPs.

We further obtained projected total population and population for women aged 15–49 years at the country level, using the SSP Database - Version 2.0 (<https://tntcat.iiasa.ac.at/SspDb/>), under the same scenarios above.<sup>11</sup> Due to the unavailability of population age structure projections for all countries, we applied country-level projections to each location in 10-year intervals from 2020 to 2100.

We then calculated the proportion of women aged 15–49 years in a future year during 2020 to 2100 by dividing the projected age group-specific population for that year by the total population projected for the same year. Finally, we utilized the proportion of women aged 15–49 at the country level and applied it to the predicted population grid for the corresponding year and SSP, in order to acquire the population grid of women aged 15-49 for the future.

## 6. *Effect estimation*

The temperature-IPV association was estimated by calculating the odds ratios (ORs) and 95 percent confidence interval (95% CI) of IPV prevalence per a 1°C increment for annual average temperature. Then, we transformed the ORs and 95% CI as percentage changes of IPV prevalence. To better facilitate interpretations for health effect, ORs and their 95% CIs were transferred into percent change in IPV prevalence associated with a 1°C increase in temperature<sup>12</sup>, using the equation as follow:

$$\text{Percent change} = (e^{\beta} - 1) \times 100\% \quad (2)$$

$$\text{Lower95\% CI} = (e^{\beta - 1.96 \times SE} - 1) \times 100\% \quad (3)$$

$$\text{Upper95\% CI} = (e^{\beta + 1.96 \times SE} - 1) \times 100\% \quad (4)$$

where  $\beta$  is the regression coefficient (log odds ratio) and SE is the standard error of the  $\beta$ .

## 7. *Linear assumption test*

We flexibly depicted the exposure-response curves using a generalized additive model to examine the shape of temperature-IPV relationships and test non-linearity of the curve. In this model, we incorporated a natural cubic spline of time with 3 degrees of freedom (df) for temperature. The linearity of the curves was examined by comparing the mean square of the residuals between the nonlinear models and the corresponding logistic models using an *F*-test.<sup>13</sup> A P value greater than 0.05 indicates no statistically



significant difference between the two models, thus confirming the linearity of the curves.

### **8. *Stratified analysis***

We conducted several stratified analyses to explore how the impact of annual temperatures on IPV prevalence differed by region (urban and rural), wealth level (lower than middle wealth level, and middle wealth level or higher), floor material (finished and not finished [natural, rudimentary or others]), roof material (finished and not finished (natural, rudimentary or others)), marital status (married and not married [living with partner, widowed, divorced, separated]), women's and their partners' age (under and over the average age), as well as educational level (primary education or lower and secondary education or higher).

### **9. *Sensitivity analyses***

We conducted two separate sensitivity analyses to verify the robustness of results. First, we fitted 3 separate models based on the main model: 1) leaving out the country-level covariates; 2) excluding precipitation from the main model; and 3) removing household wealth level from the main model. Third, we calculated mean temperature of the hottest 3 consecutive months in the year prior to the interview date, and examined the association of IPV prevalence with this exposure index to explore the effect of temperatures on IPV at different times of the year. Finally, to examine the robustness of our results under future population changes, we incorporated the projected gridded population of females aged 15-49 years from 2020 to 2100, under the corresponding socioeconomic scenario, when estimating future IPV prevalence.

## **Result**

### *Linear assumption test*

As depicted in [eFigure 2 in Supplement 1](#), the shape of E-R relationship curve between annual temperatures and the prevalence of total IPV and 3 subtypes was approximately linear in 3 South Asian countries, without any observed plateau phenomenon in the range of high temperatures. Although a plateau seemed to exist for a specific type of IPV (emotional violence, physical violence, sexual violence) in certain countries at high temperatures, the overall shape of the curve can still be considered approximately linear based on statistical testing ([eTable 6 in Supplement 1](#)).

### *Sensitivity analysis*

Compared to the result in the main model, the estimated effects of annual temperature on IPV prevalence were robust in the model using different covariates. The effect of temperature on IPV were slightly stronger in the hottest 3 months, with 5.6% higher in IPV prevalence per 1°C temperature increase (OR=1.056, 95% CI: 1.053, 1.059) ([eTable 7 in Supplement 1](#)). However, the model fit was slightly worse than the main analysis, except for emotional violence, due to possible limitations in capturing effects of all high temperature exposures ([eTable 8 in Supplement 1](#)). In addition, IPV was evaluated during the 12 months before the interview days, we thereby retained the main analysis using the annual mean temperature over the past year (moving average) to better match the exposure and health.

We further included gridded future population of women aged 15-49 years in the projection of IPV prevalence. The results indicated that compared to the projection under the assumption of no population change, the percentage increase in IPV prevalence related to climate change did not differ significantly (see [eFigure 4 and eFigure 6 in Supplement 1](#)), though the trend of excess IPV cases differed (see [eFigure 5 and eFigure 7 in Supplement 1](#)). Specifically, while the projected excess cases would

consistently rise throughout the century without accounting for the effect of projected population changes under 3 warming scenarios, they would steadily rise until the mid-century and then stabilize under SSP5-8.5 and SSP2-4.5 after accounting for population changes based on the corresponding SSP assumption. The varied trend of excess IPV cases could be caused by future population changes, which may override the impact of future climate warming.

## **Discussion**

### *Potential sources of bias*

First, despite our implementation of various measures to improve questionnaire quality and protect privacy, there may still be a degree of recall bias associated with the reported IPV data. However, this bias is unlikely to be related to environmental temperatures and thus would not substantially bias our results. Second, similar to most previous epidemiological studies, temperature was measured at the ambient level rather than the individual level; thus, exposure misclassification is inevitable. This misclassification might not change the mean estimates but only lead to an inflation of confidence intervals.<sup>16</sup>

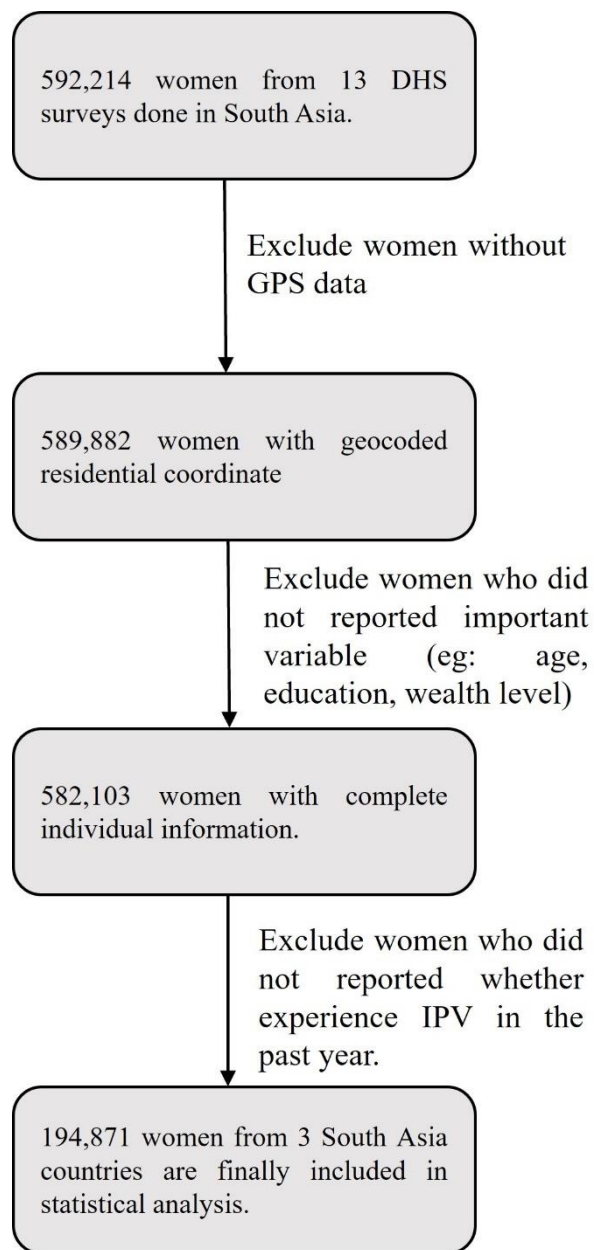

**eFigure 1.** Diagram of data preparations.

**eTable 1.** List of DHS survey included in the analysis.

| Country code | Country  | Time of survey | Number (N) | Proportion (%) |
|--------------|----------|----------------|------------|----------------|
| IA           | India    | 2015-2016      | 161,366    | 82.81          |
| NP           | Nepal    | 2010-2011      | 9,267      | 4.76           |
| NP           | Nepal    | 2016           | 9,656      | 4.96           |
| PK           | Pakistan | 2017-2018      | 14,582     | 7.48           |
|              | Total    |                | 194,871    | 100.00         |

**eTable 2.** Summary characteristics for the study population and those suffering from intimate partner violence (IPV) in different types.

| Variables                  | Intimate partner violence<br>(N=52,567) | Physical violence<br>(N=44,820) | Sexual violence<br>(N=18,430) | Emotion violence<br>(N=24,289) | No intimate partner violence<br>(N=142,304) | p-value <sup>2</sup> |
|----------------------------|-----------------------------------------|---------------------------------|-------------------------------|--------------------------------|---------------------------------------------|----------------------|
| <b>Region</b>              |                                         |                                 |                               |                                |                                             |                      |
| Urban                      | 13,350 (25.40%)                         | 11,014 (24.57%)                 | 4,364 (23.68%)                | 6,952 (28.62%)                 | 43,191 (30.35%)                             | <0.05                |
| Rural                      | 39,217 (74.60%)                         | 33,806 (75.43%)                 | 14,066 (76.32%)               | 17,337 (71.38%)                | 99,113 (69.65%)                             |                      |
| <b>Age (y)</b>             |                                         |                                 |                               |                                |                                             |                      |
| 15-20                      | 293 (0.56%)                             | 256 (0.57%)                     | 109 (0.59%)                   | 163 (0.67%)                    | 688 (0.48%)                                 | <0.05                |
| 21-30                      | 13,405 (25.50%)                         | 11,666 (26.03%)                 | 4,679 (25.39%)                | 5,884 (24.22%)                 | 33,396 (23.47%)                             |                      |
| 31-40                      | 22,627 (43.04%)                         | 19,316 (43.10%)                 | 8,160 (44.28%)                | 10,658 (43.88%)                | 59,669 (41.93%)                             |                      |
| 41-49                      | 16,242 (30.90%)                         | 13,582 (30.30%)                 | 5,482 (29.74%)                | 7,584 (31.22%)                 | 48,551 (34.12%)                             |                      |
| <b>Education</b>           |                                         |                                 |                               |                                |                                             |                      |
| No education               | 28,949 (55.07%)                         | 24,913 (55.58%)                 | 11,080 (60.12%)               | 13,675 (56.30%)                | 62,327 (43.80%)                             | <0.05                |
| Primary                    | 8,502 (16.17%)                          | 7,263 (16.20%)                  | 2,897 (15.72%)                | 3,728 (15.35%)                 | 22,168 (15.58%)                             |                      |
| Secondary                  | 13,580 (25.83%)                         | 11,498 (25.65%)                 | 4,122 (22.37%)                | 6,111 (25.16%)                 | 48,388 (34.00%)                             |                      |
| Higher                     | 1,536 (2.92%)                           | 1,146 (2.56%)                   | 331 (1.80%)                   | 775 (3.19%)                    | 9,421 (6.62%)                               |                      |
| <b>Partners' age (y)</b>   |                                         |                                 |                               |                                |                                             |                      |
| 15-20                      | 54 (0.10%)                              | 50 (0.11%)                      | 15 (0.08%)                    | 29 (0.12%)                     | 118 (0.08%)                                 | <0.05                |
| 21-30                      | 5,847 (11.12%)                          | 5,126 (11.44%)                  | 2,041 (11.07%)                | 2,521 (10.38%)                 | 14,161 (9.95%)                              |                      |
| 31-40                      | 19,577 (37.24%)                         | 16,978 (37.88%)                 | 6,909 (37.49%)                | 8,738 (35.98%)                 | 50,300 (35.35%)                             |                      |
| 41-50                      | 17,563 (33.41%)                         | 14,742 (32.89%)                 | 6,159 (33.42%)                | 8,379 (34.50%)                 | 48,257 (33.91%)                             |                      |
| >50                        | 7,616 (14.49%)                          | 5,265 (11.75%)                  | 2,536 (13.76%)                | 3,626 (14.93%)                 | 22,463 (15.79%)                             |                      |
| <b>Partners' education</b> |                                         |                                 |                               |                                |                                             |                      |

|                     |                 |                 |                 |                 |                  |       |
|---------------------|-----------------|-----------------|-----------------|-----------------|------------------|-------|
| No education        | 16,993 (32.33%) | 14,793 (33.01%) | 6,561 (35.60%)  | 8,025 (33.04%)  | 32,593 (22.90%)  | <0.05 |
| Primary             | 10,255 (19.51%) | 8,842 (19.73%)  | 3,859 (20.94%)  | 4,742 (19.52%)  | 24,196 (17.00%)  |       |
| Secondary           | 21,910 (41.68%) | 18,577 (41.45%) | 7,145 (38.77%)  | 9,834 (40.49%)  | 67,930 (47.74%)  |       |
| Higher              | 3,227 (6.14%)   | 2,465 (5.50%)   | 792 (4.30%)     | 1,573 (6.48%)   | 17,585 (12.36%)  |       |
| Marital status      |                 |                 |                 |                 |                  |       |
| Married             | 50,653 (96.36%) | 23,287(95.87%)  | 43,147 (96.26%) | 17,654 (96.27%) | 135,299 (96.47%) | <0.05 |
| Living with partner | 6 (0.01%)       | 6 (0.02%)       | 6 (0.01%)       | 6 (0.03%)       | 0 (0.00%)        |       |
| Widowed             | 1,252 (2.38%)   | 530 (2.18%)     | 1,122 (2.50%)   | 459 (2.49%)     | 6,104 (2.38%)    |       |
| Divorced            | 189 (0.36%)     | 147 (0.61%)     | 150 (0.33%)     | 83 (0.45%)      | 321 (0.36%)      |       |
| Separated           | 467 (0.89%)     | 319 (1.31%)     | 395 (0.88%)     | 228 (1.24%)     | 580 (0.89%)      |       |
| Floor material      |                 |                 |                 |                 |                  |       |
| Natural             | 27,697 (52.69%) | 24,211 (54.02%) | 10,710 (58.11%) | 12,441 (51.22%) | 60,082 (52.75%)  | <0.05 |
| Rudimentary         | 2,998 (5.70%)   | 2,623 (5.85%)   | 964 (5.23%)     | 1,338 (5.51%)   | 9,128 (5.71%)    |       |
| Finished            | 21,832 (41.53%) | 17,956 (40.06%) | 6,747 (36.61%)  | 10,492 (43.20%) | 72,998 (41.58%)  |       |
| Others              | 40 (0.08%)      | 30 (0.07%)      | 9 (0.05%)       | 18 (0.07%)      | 96 (0.08%)       |       |
| Roof material       |                 |                 |                 |                 |                  |       |
| Natural             | 5,108 (9.72%)   | 4,556 (10.17%)  | 2,039 (11.06%)  | 2,326 (9.58%)   | 10,719 (9.73%)   | <0.05 |
| Rudimentary         | 3,841 (7.31%)   | 3,043 (6.79%)   | 1,239 (6.72%)   | 2,215 (9.12%)   | 7,789 (7.32%)    |       |
| Finished            | 41,830 (79.57%) | 35,675 (79.60%) | 14,447 (78.39%) | 19,021 (78.31%) | 119,634 (79.67%) |       |
| Others              | 1,788 (3.40%)   | 1,546 (3.45%)   | 705 (3.83%)     | 727 (2.99%)     | 4,162 (3.41%)    |       |
| Wealth level        |                 |                 |                 |                 |                  |       |
| Poorest             | 17,088 (32.51%) | 15,195 (33.90%) | 7,168 (38.89%)  | 7,589 (31.24%)  | 30,918 (32.54%)  | <0.05 |
| Poorer              | 13,451 (25.59%) | 11,427 (25.50%) | 4,620 (25.07%)  | 6,278 (25.85%)  | 31,778 (25.62%)  |       |
| Middle              | 10,144 (19.30%) | 8,546 (19.07%)  | 3,208 (17.41%)  | 4,785 (19.70%)  | 29,088 (19.32%)  |       |
| Richer              | 7,585 (14.43%)  | 6,252 (13.95%)  | 2,250 (12.21%)  | 3,599 (14.82%)  | 26,367 (14.45%)  |       |

|                                        |               |               |                |               |                |       |
|----------------------------------------|---------------|---------------|----------------|---------------|----------------|-------|
| Richest                                | 4,299 (8.18%) | 3,400 (7.59%) | 1,184 (6.42%)  | 2,038 (8.39%) | 24,153 (8.19%) |       |
| Annual temperature (°C) <sup>1</sup>   | 19.3±7.2      | 19.9±6.6      | 19.9±6.6       | 17.7±8.3      | 18.9±7.5       | <0.05 |
| Annual precipitation (mm) <sup>1</sup> | 2007.5±775.6  | 2053.1±730.0  | 2071.375±711.8 | 1898.0±876.0  | 1961.9±812.1   | <0.05 |

<sup>1</sup> Data are listed as mean±SD, SD: standard deviation.

<sup>2</sup> p-value is the result of chi-squared test and t test to examine the differential distribution of characteristics between samples experience IPV and those without IPV experience in the past year.



**eTable 3.** Summary characteristics for the samples in original database and the samples included in final analysis.

| Variables                  | Samples in original database<br>(N=592,214) | Samples included in final analysis<br>(N=194,871) |
|----------------------------|---------------------------------------------|---------------------------------------------------|
| <b>Region</b>              |                                             |                                                   |
| Urban                      | 175,849 (29.69%)                            | 56,541 (29.01%)                                   |
| Rural                      | 416,365 (70.31%)                            | 138,330 (70.99%)                                  |
| <b>Age (y)</b>             |                                             |                                                   |
| 15-20                      | 22,774 (3.85%)                              | 981 (0.5%)                                        |
| 21-30                      | 214,700 (36.25%)                            | 46,801 (24.02%)                                   |
| 31-40                      | 211,213 (35.66%)                            | 82,296 (42.23%)                                   |
| 41-49                      | 143,527 (24.24%)                            | 64,793 (33.25%)                                   |
| <b>Education</b>           |                                             |                                                   |
| No education               | 222,715 (37.61%)                            | 91,276 (46.84%)                                   |
| Primary                    | 99,408 (16.79%)                             | 30,670 (15.74%)                                   |
| Secondary                  | 223,496 (37.74%)                            | 61,968 (31.8%)                                    |
| Higher                     | 46,595 (7.87%)                              | 10,957 (5.62%)                                    |
| <b>Partners' age (y)</b>   |                                             |                                                   |
| 15-20                      | 711 (0.12%)                                 | 172 (0.09%)                                       |
| 21-30                      | 78,409 (13.24%)                             | 20,008 (10.27%)                                   |
| 31-40                      | 193,950 (32.75%)                            | 69,877 (35.86%)                                   |
| 41-50                      | 203,011 (34.28%)                            | 65,820 (33.78%)                                   |
| >50                        | 116,133 (19.61%)                            | 30,079 (15.44%)                                   |
| <b>Partners' education</b> |                                             |                                                   |
| No education               | 145,437 (24.56%)                            | 49,586 (25.45%)                                   |
| Primary                    | 123,220 (20.81%)                            | 34,451 (17.68%)                                   |
| Secondary                  | 240,236 (40.57%)                            | 89,840 (46.1%)                                    |
| Higher                     | 83,323 (14.07%)                             | 20,238 (10.39%)                                   |
| <b>Marital status</b>      |                                             |                                                   |
| Married                    | 560,572 (94.66%)                            | 185,952 (95.42%)                                  |
| Living with partner        | 6 (0.01%)                                   | 6 (0.01%)                                         |
| Widowed                    | 23,360 (3.94%)                              | 7,356 (3.77%)                                     |
| Divorced                   | 2,738 (0.46%)                               | 510 (0.26%)                                       |
| Separated                  | 4,849 (0.82%)                               | 1,047 (0.54%)                                     |
| <b>Floor material</b>      |                                             |                                                   |
| Natural                    | 257,524 (43.48%)                            | 87,779 (45.04%)                                   |
| Rudimentary                | 36,811 (6.22%)                              | 12,126 (6.22%)                                    |
| Finished                   | 297,275 (50.20%)                            | 94,830 (48.66%)                                   |
| Others                     | 604 (0.10%)                                 | 136 (0.07%)                                       |
| <b>Roof material</b>       |                                             |                                                   |

|             |                  |                  |
|-------------|------------------|------------------|
| Natural     | 50,320 (8.50%)   | 15,827 (8.12%)   |
| Rudimentary | 26,138 (4.41%)   | 11,630 (5.97%)   |
| Finished    | 499,265 (84.30%) | 161,464 (82.86%) |
| Others      | 16,491 (2.78%)   | 5,950 (3.05%)    |

---

**eTable 4.** Summary statistics for annual-mean temperatures and IPV prevalence in different types during 2010-2018 in 3 South Asian countries.

| Exposure/Prevalence | 3 South Asian countries | India          | Nepal         | Pakistan      |
|---------------------|-------------------------|----------------|---------------|---------------|
| Temperature (°C)    | 21.6±8.8                | 23.7±6.2       | 9.7±11.8      | 14.2±11.9     |
| IPV                 | 52,567 (27.0%)          | 44,574 (27.6%) | 3,342 (17.7%) | 4,651 (31.9%) |
| Physical violence   | 44,820 (23.0%)          | 39,405 (24.4%) | 2,766 (14.6%) | 2,649 (18.2%) |
| Sexual violence     | 18,430 (9.5%)           | 16,121 (10.0%) | 1,254 (6.6%)  | 1,055 (7.2%)  |
| Emotional violence  | 24,289 (12.5%)          | 18,442 (11.4%) | 1,966 (10.4%) | 3,881 (26.6%) |

**eTable 5.** Spearman correlation coefficient of individual and household variables.

| Variables                 | Residence type | Woman's age | Woman's education level | Partner's age | Partner's education level | Marital status | Floor material | Roof material | Wealth level |
|---------------------------|----------------|-------------|-------------------------|---------------|---------------------------|----------------|----------------|---------------|--------------|
| Residence type            | 1.000          | -0.025      | -0.230                  | -0.034        | -0.175                    | -0.009         | -0.355         | -0.097        | -0.454       |
| Woman's age               | -              | 1.000       | -0.202                  | 0.775         | -0.108                    | 0.005          | 0.037          | 0.006         | 0.055        |
| Woman's education level   | -              | -           | 1.000                   | -0.170        | 0.515                     | -0.006         | 0.356          | 0.134         | 0.411        |
| Partner's age             | -              | -           | -                       | 1.000         | -0.112                    | 0.003          | 0.052          | 0.003         | 0.061        |
| Partner's education level | -              | -           | -                       | -             | 1.000                     | -0.001         | 0.295          | 0.121         | 0.435        |
| Marital status            | -              | -           | -                       | -             | -                         | 1.000          | -0.006         | -0.011        | 0            |
| Floor material            | -              | -           | -                       | -             | -                         | -              | 1.000          | 0.204         | 0.405        |
| Roof material             | -              | -           | -                       | -             | -                         | -              | -              | 1.000         | 0.247        |
| Wealth level              | -              | -           | -                       | -             | -                         | -              | -              | -             | 1            |

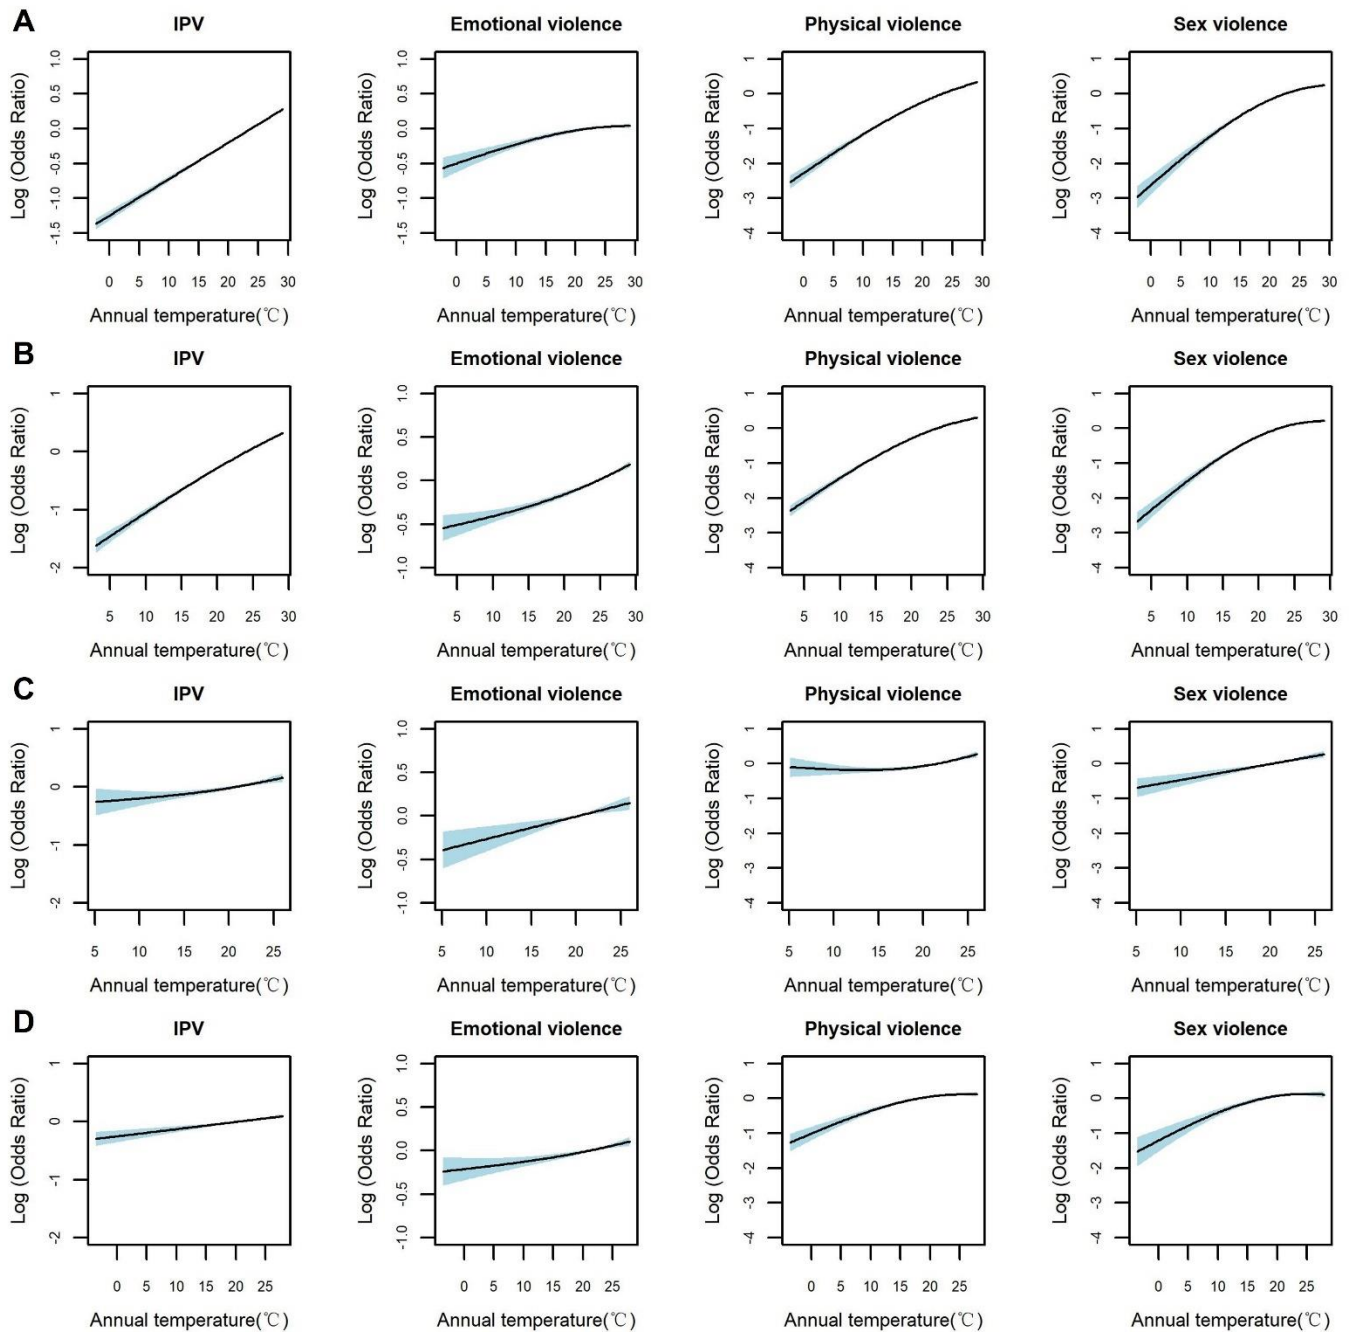

**eFigure 2. Exposure–response curves for the associations between annual temperature and prevalence of IPV in South Asia, classified by IPV types and countries. A: 3 South Asian countries; B: India; C: Nepal; D: Pakistan. The solid line is the log-transformed odds ratio of IPV; the shaded areas are the 95% confidence intervals.**

**eTable 6.** Summary of p-value for *F*-test to examine linearity of the exposure-response curves.

| IPV type           | South Asia | India | Nepal | Pakistan |
|--------------------|------------|-------|-------|----------|
| Total IPV          | 0.383      | 0.371 | 0.192 | 0.265    |
| Emotional violence | 0.265      | 0.228 | 0.330 | 0.256    |
| Physical violence  | 0.234      | 0.124 | 0.163 | 0.126    |
| Sexual violence    | 0.186      | 0.176 | 0.252 | 0.112    |

**eTable 7.** Odds ratios (95% confidence intervals) of IPV prevalence per 1°C increment in annual temperature in models of sensitivity analyses

| Model             | IPV                  | Physical violence    | Sexual violence      | Emotional violence   |
|-------------------|----------------------|----------------------|----------------------|----------------------|
| <i>Main model</i> | 1.045 (1.042, 1.048) | 1.014 (1.010, 1.017) | 1.066 (1.062, 1.069) | 1.062 (1.057, 1.067) |
| <i>Model 1</i>    | 1.047 (1.044, 1.050) | 1.015 (1.012, 1.018) | 1.067 (1.064, 1.071) | 1.065 (1.059, 1.070) |
| <i>Model 2</i>    | 1.042 (1.039, 1.046) | 1.014 (1.010, 1.017) | 1.064 (1.060, 1.067) | 1.051 (1.046, 1.057) |
| <i>Model 3</i>    | 1.053 (1.050, 1.056) | 1.008 (1.005, 1.011) | 1.079 (1.076, 1.083) | 1.074 (1.069, 1.079) |
| <i>Model 4</i>    |                      |                      |                      |                      |
| South Asia        | 1.056 (1.053, 1.059) | 1.076 (1.072, 1.079) | 1.090 (1.085, 1.095) | 1.023 (1.019, 1.026) |
| India             | 1.064 (1.060, 1.067) | 1.080 (1.076, 1.084) | 1.085 (1.079, 1.091) | 1.027 (1.022, 1.031) |
| Nepal             | 1.042 (1.031, 1.053) | 1.048 (1.036, 1.060) | 1.054 (1.036, 1.071) | 1.037 (1.024, 1.051) |
| Pakistan          | 1.035 (1.031, 1.040) | 1.044 (1.038, 1.050) | 1.036 (1.028, 1.044) | 1.037 (1.032, 1.042) |

\*Note: the covariates of *Main model* included women’s socioeconomic factors, country-level covariates and annual cumulative precipitation. The covariates of *Model 1* included the covariates in the *Main model* with the exception of the country-level factors. The covariates of *Model 2* included the covariates in the *Main model* with the exception of the annual cumulative precipitation. The covariates of *Model 3* included the covariates in the *Main model* with the exception of the household wealth level. *Model 4* applied average temperature of the hottest 3 consecutive months in the past year to replace the annual temperature in the *Main model*.

**eTable 8.** R<sup>2</sup> of models using annual temperature and average temperature of the hottest 3 consecutive months in the past year in sensitivity analyses

| Region/country | Model*                   | IPV    | Physical violence | Sexual violence | Emotional violence |
|----------------|--------------------------|--------|-------------------|-----------------|--------------------|
| South Asia     | Main model               | 0.042  | 0.035             | 0.050           | 0.049              |
|                | Model 4                  | 0.041  | 0.035             | 0.049           | 0.047              |
|                | Change of R <sup>2</sup> | 2.38%  | 0.00%             | 2.00%           | 4.08%              |
| India          | Main model               | 0.044  | 0.021             | 0.050           | 0.052              |
|                | Model 4                  | 0.042  | 0.021             | 0.048           | 0.048              |
|                | Change of R <sup>2</sup> | 4.55%  | 0.00%             | 4.00%           | 7.69%              |
| Nepal          | Main model               | 0.030  | 0.029             | 0.034           | 0.038              |
|                | Model 4                  | 0.028  | 0.021             | 0.032           | 0.041              |
|                | Change of R <sup>2</sup> | 6.67%  | 27.59%            | 5.88%           | -7.89%             |
| Pakistan       | Main model               | 0.028  | 0.032             | 0.033           | 0.030              |
|                | Model 4                  | 0.023  | 0.024             | 0.031           | 0.030              |
|                | Change of R <sup>2</sup> | 17.86% | 25.00%            | 6.06%           | 0.00%              |

\*Note: the covariates of *Main model* included women’s socioeconomic factors, country-level covariates and annual cumulative precipitation. *Model 4* applied average temperature of the hottest 3 consecutive months in the past year to replace the annual temperature in the *Main model*.



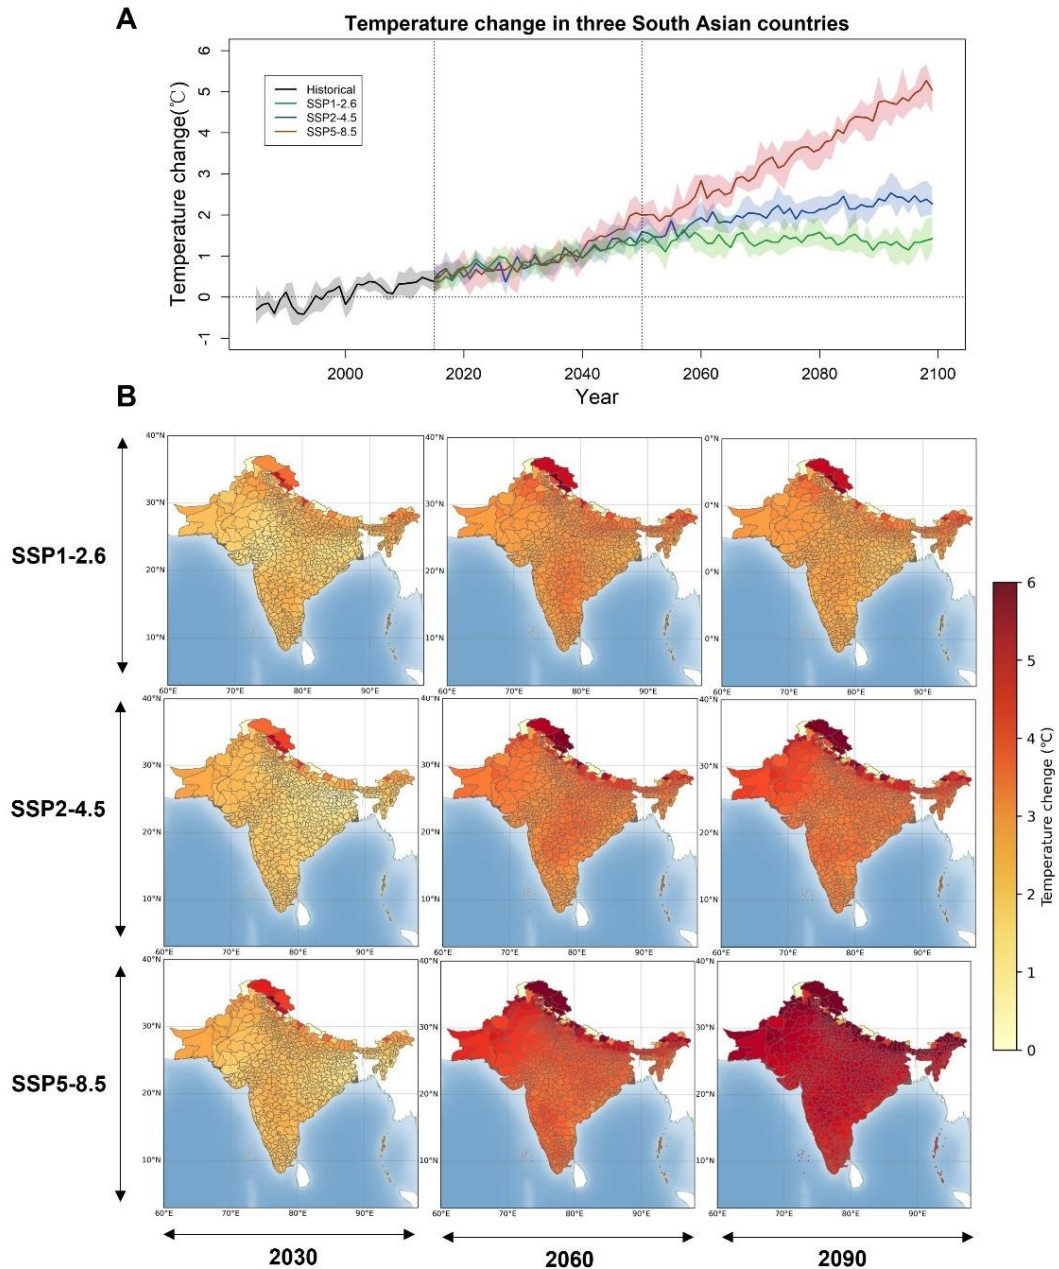

**Figure 3. Projected changes in annual mean temperature from the baseline period (1985-2014) under different climate scenarios in 3 South Asian countries. A:** Temporal trends of annual temperature change from the baseline period under 3 climate scenarios from 1985 to 2100. The shaded areas are the interquartile ranges of predicted temperatures from ten general circulation models. **B:** Spatial differentiation of temperature change from the baseline period in city in 2030 (2021-2040), 2060 (2051-2070), 2090 (2081-2100). SSP=Shared Socioeconomic Pathway.

**eTable 9.** Summary statistics of the projected annual temperature under the SSP1-2.6, SSP2-4.5 and SSP5-8.5 scenarios in the 2010s, 2030s, 2050s, 2070s and 2090s.

| Region/<br>Countries | Years | Projected temperature (°C) |                                         |                     |                                         |                     |                                         |
|----------------------|-------|----------------------------|-----------------------------------------|---------------------|-----------------------------------------|---------------------|-----------------------------------------|
|                      |       | SSP1-2.6                   |                                         | SSP2-4.5            |                                         | SSP5-8.5            |                                         |
|                      |       | Temperature<br>(°C)        | Temperature<br>change (°C) <sup>a</sup> | Temperature<br>(°C) | Temperature<br>change (°C) <sup>a</sup> | Temperature<br>(°C) | Temperature<br>change (°C) <sup>a</sup> |
| Total <sup>b</sup>   | 2010s | 20.2 (19.9, 20.5)          | 0.3 (0, 0.6)                            | 20.2 (19.9, 20.5)   | 0.3 (0, 0.6)                            | 20.2 (19.9, 20.5)   | 0.3 (0, 0.6)                            |
|                      | 2030s | 20.7 (20.6, 21.0)          | 0.8 (0.7, 1.1)                          | 20.6 (20.3, 20.9)   | 0.7 (0.4, 1.0)                          | 20.8 (20.6, 21.2)   | 0.9 (0.7, 1.3)                          |
|                      | 2050s | 21.3 (21.1, 21.5)          | 1.4 (1.2, 1.6)                          | 21.5 (21.1, 21.9)   | 1.6 (1.2, 2.0)                          | 21.9 (21.6, 22.1)   | 2.0 (1.7, 2.2)                          |
|                      | 2070s | 21.2 (20.9, 21.6)          | 1.3 (1.0, 1.7)                          | 21.9 (21.8, 22.1)   | 2.0 (1.9, 2.2)                          | 23.1 (22.6, 23.7)   | 3.2 (2.6, 3.8)                          |
|                      | 2090s | 21.2 (21.0, 21.4)          | 1.3 (1.1, 1.5)                          | 22.3 (22.1, 22.6)   | 2.4 (2.2, 2.7)                          | 24.7 (24.1, 25.3)   | 4.7 (4.2, 5.4)                          |
| India                | 2010s | 24.1 (23.8, 24.4)          | 0.2 (0, 0.5)                            | 24.1 (23.8, 24.4)   | 0.2 (0, 0.5)                            | 24.1 (23.8, 24.4)   | 0.2 (0, 0.5)                            |
|                      | 2030s | 24.5 (24.5, 24.6)          | 0.7 (0.6, 0.8)                          | 24.3 (24.0, 24.5)   | 0.5 (0.2, 0.6)                          | 24.5 (24.1, 24.9)   | 0.7 (0.3, 1.1)                          |
|                      | 2050s | 25.2 (25.0, 25.1)          | 1.3 (1.2, 1.3)                          | 25.1 (25.0, 25.3)   | 1.2 (1.1, 1.5)                          | 25.5 (25.1, 25.8)   | 1.7 (1.3, 2.0)                          |
|                      | 2070s | 25.0 (24.8, 25.5)          | 1.2 (0.9, 1.6)                          | 25.5 (25.2, 25.7)   | 1.7 (1.4, 1.8)                          | 26.7 (26.3, 27.2)   | 2.8 (2.5, 3.3)                          |
|                      | 2090s | 25.0 (24.9, 25.1)          | 1.2 (1.0, 1.2)                          | 25.8 (25.6, 26.0)   | 2.0 (1.8, 2.2)                          | 28.0 (27.3, 28.6)   | 4.2 (3.5, 4.8)                          |
| Nepal                | 2010s | 14.8 (14.5, 15.1)          | 0.3 (0, 0.6)                            | 14.8 (14.5, 15.1)   | 0.3 (0, 0.6)                            | 14.8 (14.5, 15.1)   | 0.3 (0, 0.6)                            |
|                      | 2030s | 15.3 (15.0, 15.5)          | 0.8 (0.5, 1.1)                          | 15.2 (14.9, 15.6)   | 0.7 (0.4, 1.1)                          | 15.4 (15.2, 15.8)   | 1.0 (0.7, 1.3)                          |
|                      | 2050s | 16.0 (15.8, 16.1)          | 1.5 (1.4, 1.7)                          | 16.4 (15.9, 16.5)   | 1.9 (1.5, 2.0)                          | 16.7 (16.2, 17.1)   | 2.2 (1.7, 2.6)                          |
|                      | 2070s | 15.7 (15.4, 16.0)          | 1.2 (1.0, 1.5)                          | 16.7 (16.5, 16.9)   | 2.2 (2.1, 2.4)                          | 17.9 (17.4, 18.6)   | 3.5 (2.9, 4.1)                          |
|                      | 2090s | 15.8 (15.7, 16.1)          | 1.3 (1.2, 1.6)                          | 17.0 (16.5, 17.5)   | 2.6 (2.3, 2.7)                          | 19.5 (19.2, 19.7)   | 5.0 (4.5, 5.4)                          |
| Pakistan             | 2010s | 21.2 (20.2, 22.4)          | 0.4 (0, 0.8)                            | 21.8 (21.4, 22.2)   | 0.4 (0, 0.8)                            | 21.8 (21.4, 22.2)   | 0.4 (0, 0.8)                            |
|                      | 2030s | 21.2 (20.1, 22.6)          | 0.9 (0.3, 1.2)                          | 22.2 (22.3, 22.5)   | 0.8 (0.9, 1.1)                          | 22.4 (21.9, 22.9)   | 1.0 (0.5, 1.5)                          |
|                      | 2050s | 21.9 (20.8, 23.1)          | 1.4 (1.0, 1.8)                          | 23.1 (22.6, 23.5)   | 1.7 (1.2, 2.1)                          | 23.5 (23.4, 23.7)   | 2.1 (2.0, 2.3)                          |
|                      | 2070s | 21.9 (20.3, 23.3)          | 1.5 (0.9, 1.8)                          | 23.6 (23.5, 23.9)   | 2.2 (2.1, 2.5)                          | 24.7 (24.2, 25.1)   | 3.3 (2.8, 3.7)                          |

---

|       |                   |                |                   |                |                   |                |
|-------|-------------------|----------------|-------------------|----------------|-------------------|----------------|
| 2090s | 22.0 (20.8, 23.4) | 1.5 (1.1, 1.8) | 24.0 (23.7, 24.4) | 2.6 (2.3, 3.0) | 26.4 (25.8, 27.0) | 5.0 (4.4, 5.6) |
|-------|-------------------|----------------|-------------------|----------------|-------------------|----------------|

---

Note:

<sup>a</sup> Temperature change means projected increase in the mean temperature for the specified decade versus the baseline period (1985-2014).

<sup>b</sup> Total means is for the 3 South Asian countries together.

Abbreviation: SSP=Shared Socioeconomic Pathway.

**eTable 10.** Projected percentage change of IPV prevalence attributable to climate warming comparing specific decades to the baseline period (1985-2014) in 3 South Asian countries, by country, period, and climate change scenario, under the assumption of no change in population size and structure.

| Region/<br>countries | Years | Percentage change of IPV prevalence (%) |                   |                   |
|----------------------|-------|-----------------------------------------|-------------------|-------------------|
|                      |       | SSP1-2.6                                | SSP2-4.5          | SSP5-8.5          |
| Total <sup>a</sup>   | 2010s | 0.2 (0.1, 0.4)                          | 0.2 (0.1, 0.4)    | 0.2 (0.1, 0.4)    |
|                      | 2030s | 3.2 (2.9, 3.5)                          | 2.2 (1.9, 2.4)    | 3.2 (2.9, 3.6)    |
|                      | 2050s | 6.8 (6.3, 7.3)                          | 5.8 (5.3, 6.2)    | 8.0 (7.3, 8.6)    |
|                      | 2070s | 6.0 (5.6, 6.5)                          | 8.0 (7.4, 8.6)    | 14.2 (13.1, 15.3) |
|                      | 2090s | 5.8 (5.3, 6.2)                          | 9.8 (9.0, 10.5)   | 21.0 (19.4, 22.6) |
| India                | 2010s | 0.2 (0.1, 0.3)                          | 0.2 (0.1, 0.3)    | 0.2 (0.1, 0.3)    |
|                      | 2030s | 3.6 (3.3, 3.9)                          | 2.4 (2.2, 2.6)    | 3.6 (3.3, 3.9)    |
|                      | 2050s | 7.6 (7.2, 8.1)                          | 6.4 (6.0, 6.8)    | 8.9 (8.3, 9.4)    |
|                      | 2070s | 6.8 (6.3, 7.2)                          | 8.9 (8.4, 9.4)    | 15.9 (14.9, 16.8) |
|                      | 2090s | 6.4 (6.0, 6.8)                          | 10.9 (10.2, 11.5) | 23.5 (22.0, 24.9) |
| Nepal                | 2010s | 0.4 (-0.1, 0.9)                         | 0.4 (-0.1, 0.9)   | 0.4 (-0.1, 0.9)   |
|                      | 2030s | 2.4 (1.3, 3.5)                          | 2.0 (1.1, 2.8)    | 2.6 (1.5, 3.7)    |
|                      | 2050s | 4.3 (2.5, 6.1)                          | 5.4 (3.1, 7.6)    | 6.3 (3.7, 8.8)    |
|                      | 2070s | 3.6 (2.1, 5.1)                          | 6.4 (3.7, 9.0)    | 10.0 (5.9, 14.1)  |
|                      | 2090s | 3.7 (2.2, 5.3)                          | 7.5 (4.3, 10.5)   | 14.8 (8.7, 20.8)  |
| Pakistan             | 2010s | 0.3 (0.1, 0.6)                          | 0.3 (0.1, 0.6)    | 0.3 (0.1, 0.6)    |
|                      | 2030s | 1.0 (0.5, 1.4)                          | 0.8 (0.5, 1.2)    | 1.0 (0.5, 1.5)    |
|                      | 2050s | 1.7 (1.0, 2.4)                          | 1.8 (1.1, 2.6)    | 2.4 (1.4, 3.4)    |
|                      | 2070s | 1.8 (1.1, 2.5)                          | 2.5 (1.4, 3.5)    | 3.8 (2.3, 5.4)    |
|                      | 2090s | 1.8 (1.1, 2.5)                          | 3.0 (1.8, 4.2)    | 5.9 (3.5, 8.2)    |

Note: <sup>a</sup> Total is for the 3 South Asian countries together.

Abbreviation: SSP=Shared Socioeconomic Pathway.

**eTable 11.** Projected percentage change of physical violence, sexual violence and emotional violence prevalence in 3 South Asian countries from the baseline period (1985-2014) under the SSP1-2.6, SSP2-4.5 and SSP5-8.5 scenarios in the 2010s, 2030s, 2050s, 2070s and 2090s, under the assumption of no change in population.

| IPV                  | Region/<br>countries | Years | Percentage change of prevalence (%) |                   |                   |
|----------------------|----------------------|-------|-------------------------------------|-------------------|-------------------|
|                      |                      |       | SSP1-2.6                            | SSP2-4.5          | SSP5-8.5          |
| Physical<br>violence | Total <sup>a</sup>   | 2010s | 0.3 (0.2, 0.5)                      | 0.3 (0.2, 0.5)    | 0.3 (0.2, 0.5)    |
|                      |                      | 2030s | 4.3 (4.0, 4.7)                      | 2.9 (2.7, 3.2)    | 4.4 (4.0, 4.7)    |
|                      |                      | 2050s | 9.1 (8.6, 9.7)                      | 7.8 (7.3, 8.3)    | 10.8 (10.1, 11.5) |
|                      |                      | 2070s | 8.2 (7.6, 8.7)                      | 10.8 (10.1, 11.5) | 19.1 (18.0, 20.3) |
|                      |                      | 2090s | 7.8 (7.3, 8.3)                      | 13.2 (12.4, 14.0) | 28.3 (26.6, 30.1) |
|                      | India                | 2010s | 0.3 (0.1, 0.4)                      | 0.3 (0.1, 0.4)    | 0.3 (0.1, 0.4)    |
|                      |                      | 2030s | 4.6 (4.2, 4.9)                      | 3.0 (2.8, 3.2)    | 4.6 (4.3, 4.9)    |
|                      |                      | 2050s | 9.7 (9.2, 10.2)                     | 8.1 (7.7, 8.6)    | 11.3 (10.7, 11.9) |
|                      |                      | 2070s | 8.6 (8.1, 9.0)                      | 11.3 (10.7, 11.9) | 20.2 (19.1, 21.3) |
|                      |                      | 2090s | 8.2 (7.7, 8.6)                      | 13.8 (13.1, 14.5) | 29.8 (28.3, 31.4) |
|                      | Nepal                | 2010s | 0.5 (0, 1.1)                        | 0.5 (0, 1.1)      | 0.5 (0, 1.1)      |
|                      |                      | 2030s | 3.0 (1.8, 4.2)                      | 2.5 (1.6, 3.5)    | 3.4 (2.2, 4.6)    |
|                      |                      | 2050s | 5.5 (3.5, 7.5)                      | 6.9 (4.5, 9.3)    | 8.0 (5.2, 10.8)   |
|                      |                      | 2070s | 4.6 (3.0, 6.2)                      | 8.2 (5.3, 11.0)   | 12.8 (8.4, 17.2)  |
|                      |                      | 2090s | 4.8 (3.1, 6.4)                      | 9.6 (6.2, 12.8)   | 18.9 (12.4, 25.4) |
|                      | Pakistan             | 2010s | 0.8 (0.5, 1.1)                      | 0.8 (0.5, 1.1)    | 0.8 (0.5, 1.1)    |
|                      |                      | 2030s | 2.5 (1.9, 3.0)                      | 2.2 (1.7, 2.6)    | 2.5 (1.9, 3.1)    |
|                      |                      | 2050s | 4.3 (3.5, 5.2)                      | 4.6 (3.7, 5.6)    | 6.1 (4.9, 7.3)    |
|                      |                      | 2070s | 4.6 (3.7, 5.4)                      | 6.2 (5.0, 7.5)    | 9.7 (7.9, 11.6)   |
|                      |                      | 2090s | 4.5 (3.7, 5.4)                      | 7.6 (6.2, 9.1)    | 14.9 (12.0, 17.7) |
| Sexual<br>violence   | Total <sup>a</sup>   | 2010s | 0.3 (0.1, 0.5)                      | 0.3 (0.1, 0.5)    | 0.3 (0.1, 0.5)    |
|                      |                      | 2030s | 4.0 (3.5, 4.6)                      | 2.7 (2.3, 3.1)    | 4.0 (3.5, 4.6)    |
|                      |                      | 2050s | 8.4 (7.6, 9.3)                      | 7.2 (6.4, 8.0)    | 10.0 (8.9, 11.0)  |
|                      |                      | 2070s | 7.5 (6.7, 8.3)                      | 10.0 (8.9, 11.0)  | 17.7 (15.9, 19.5) |
|                      |                      | 2090s | 7.2 (6.4, 7.9)                      | 12.2 (10.9, 13.4) | 26.1 (23.4, 28.8) |
|                      | India                | 2010s | 0.2 (0, 0.4)                        | 0.2 (0, 0.4)      | 0.2 (0, 0.4)      |
|                      |                      | 2030s | 4.2 (3.7, 4.6)                      | 2.7 (2.4, 3.1)    | 4.2 (3.7, 4.6)    |
|                      |                      | 2050s | 8.8 (8.0, 9.6)                      | 7.4 (6.7, 8.1)    | 10.3 (9.4, 11.2)  |
|                      |                      | 2070s | 7.8 (7.1, 8.5)                      | 10.3 (9.4, 11.2)  | 18.4 (16.8, 20.0) |
|                      |                      | 2090s | 7.4 (6.7, 8.1)                      | 12.6 (11.5, 13.7) | 27.2 (24.7, 29.6) |
|                      | Nepal                | 2010s | 0.7 (-0.1, 1.5)                     | 0.7 (-0.1, 1.5)   | 0.7 (-0.1, 1.5)   |
|                      |                      | 2030s | 4.0 (2.3, 5.7)                      | 3.4 (2.0, 4.7)    | 4.5 (2.8, 6.1)    |
|                      |                      | 2050s | 7.3 (4.5, 10.0)                     | 9.1 (5.7, 12.5)   | 10.6 (6.6, 14.5)  |
|                      |                      | 2070s | 6.1 (3.8, 8.3)                      | 10.8 (6.8, 14.8)  | 17.0 (10.6, 23.1) |
|                      |                      | 2090s | 6.3 (3.9, 8.6)                      | 12.6 (7.9, 17.3)  | 25.0 (15.6, 34.1) |

|                    |                    |                |                 |                 |                   |
|--------------------|--------------------|----------------|-----------------|-----------------|-------------------|
| Emotional violence | Pakistan           | 2010s          | 0.9 (0.4, 1.3)  | 0.9 (0.4, 1.3)  | 0.9 (0.4, 1.3)    |
|                    |                    | 2030s          | 2.6 (1.8, 3.5)  | 2.3 (1.6, 3.0)  | 2.7 (1.8, 3.6)    |
|                    |                    | 2050s          | 4.6 (3.4, 5.8)  | 5.0 (3.6, 6.3)  | 6.5 (4.8, 8.3)    |
|                    |                    | 2070s          | 4.9 (3.6, 6.1)  | 6.7 (4.8, 8.4)  | 10.4 (7.6, 13.1)  |
|                    |                    | 2090s          | 4.8 (3.6, 6.1)  | 8.1 (6.0, 10.3) | 15.9 (11.6, 20.1) |
|                    | Total <sup>a</sup> | 2010s          | 0.1 (0, 0.3)    | 0.1 (0, 0.3)    | 0.1 (0, 0.3)      |
|                    |                    | 2030s          | 1.4 (1.0, 1.8)  | 1.0 (0.6, 1.3)  | 1.4 (1.0, 1.8)    |
|                    |                    | 2050s          | 2.8 (2.2, 3.5)  | 2.5 (1.9, 3.1)  | 3.4 (2.6, 4.3)    |
|                    |                    | 2070s          | 2.6 (2.0, 3.2)  | 3.4 (2.6, 4.3)  | 6.0 (4.6, 7.4)    |
|                    |                    | 2090s          | 2.5 (1.9, 3.1)  | 4.2 (3.2, 5.2)  | 8.9 (6.8, 11.0)   |
|                    | India              | 2010s          | 0.1 (-0.1, 0.3) | 0.1 (-0.1, 0.3) | 0.1 (-0.1, 0.3)   |
|                    |                    | 2030s          | 1.5 (1.1, 1.9)  | 1.0 (0.7, 1.3)  | 1.5 (1.1, 1.9)    |
|                    |                    | 2050s          | 3.2 (2.6, 3.8)  | 2.7 (2.1, 3.2)  | 3.7 (3.0, 4.5)    |
|                    |                    | 2070s          | 2.8 (2.3, 3.4)  | 3.7 (3.0, 4.5)  | 6.7 (5.4, 8.0)    |
|                    |                    | 2090s          | 2.7 (2.1, 3.2)  | 4.6 (3.7, 5.4)  | 9.9 (7.9, 11.8)   |
|                    | Nepal              | 2010s          | 0.4 (0.2, 0.6)  | 0.4 (0.2, 0.6)  | 0.4 (0.2, 0.6)    |
|                    |                    | 2030s          | 2.2 (1.7, 2.7)  | 1.8 (1.4, 2.2)  | 2.5 (2.0, 3.0)    |
|                    |                    | 2050s          | 4.0 (3.2, 4.8)  | 5.0 (4.0, 6.0)  | 5.8 (4.6, 7.0)    |
|                    |                    | 2070s          | 3.3 (2.7, 4.0)  | 5.9 (4.7, 7.1)  | 9.3 (7.4, 11.1)   |
|                    |                    | 2090s          | 3.5 (2.8, 4.2)  | 6.9 (5.5, 8.3)  | 13.7 (11.0, 16.4) |
| Pakistan           | 2010s              | 0.3 (0, 0.6)   | 0.3 (0, 0.6)    | 0.3 (0, 0.6)    |                   |
|                    | 2030s              | 0.9 (0.4, 1.4) | 0.8 (0.4, 1.2)  | 1.0 (0.4, 1.5)  |                   |
|                    | 2050s              | 1.6 (0.9, 2.4) | 1.8 (0.9, 2.6)  | 2.3 (1.2, 3.4)  |                   |
|                    | 2070s              | 1.7 (0.9, 2.5) | 2.4 (1.2, 3.5)  | 3.7 (2.0, 5.4)  |                   |
|                    | 2090s              | 1.7 (0.9, 2.5) | 2.9 (1.6, 4.2)  | 5.6 (3.0, 8.2)  |                   |

Note: <sup>a</sup> Total is for the 3 South Asian countries together.

Abbreviation: SSP=Shared Socioeconomic Pathway.

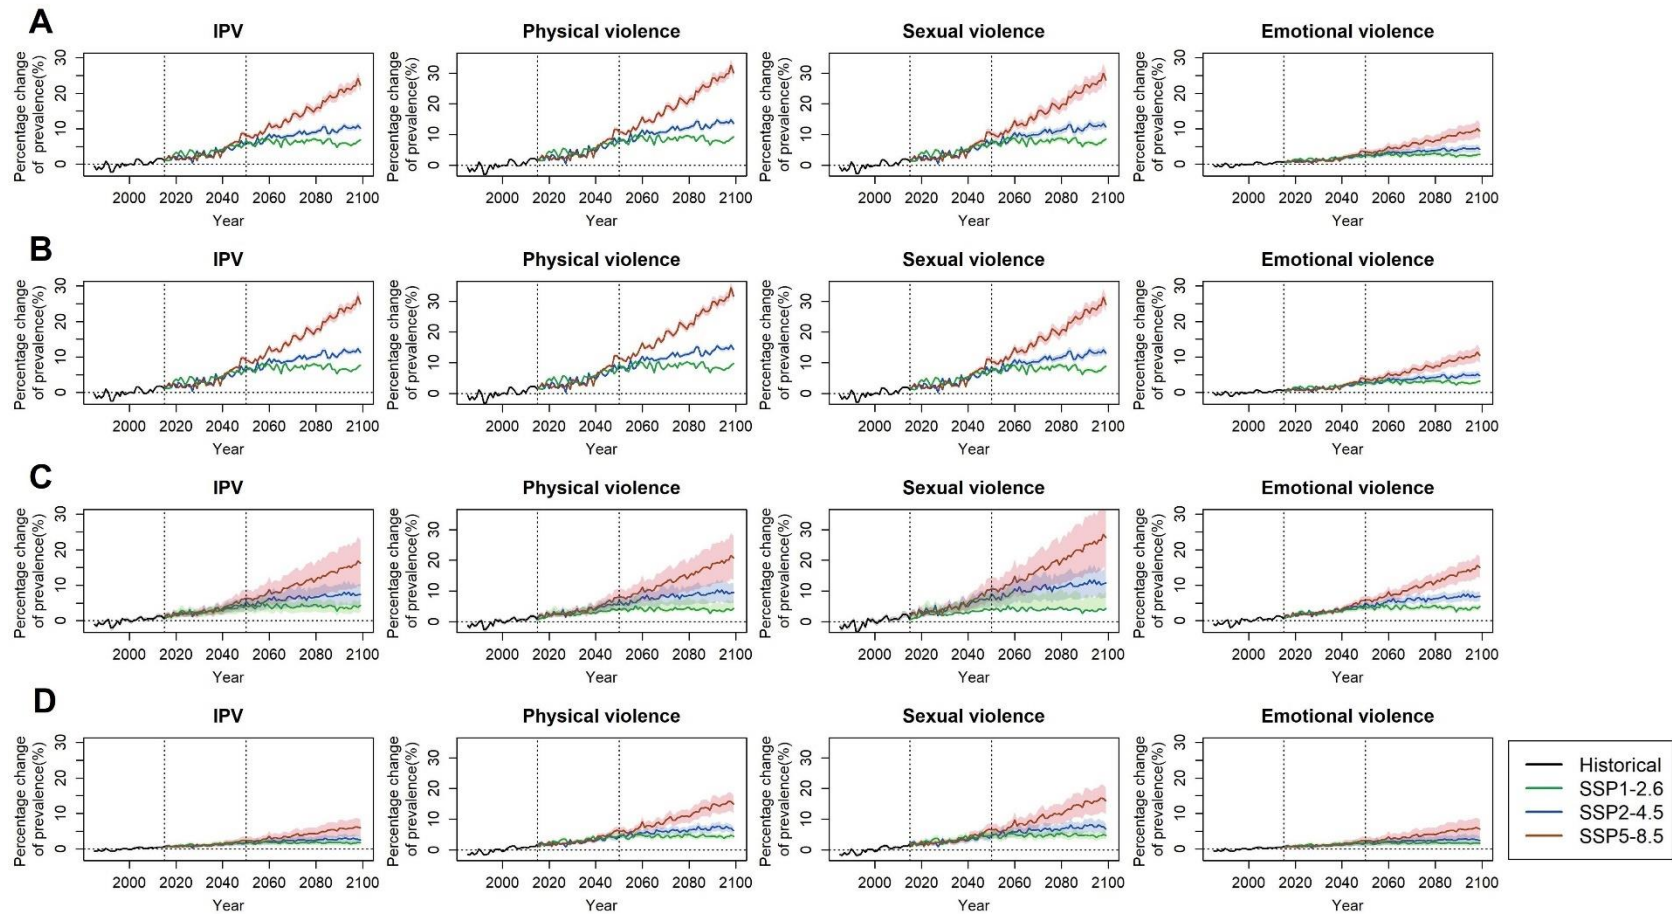

**Figure 4. Projected percentage changes in IPV prevalence attributable to climate warming from the baseline period (1985-2014) in 3 South Asian countries under different climate scenarios, under the assumption of no change in population. A: 3 South Asian countries; B: India; C: Nepal; D: Pakistan. The solid line is the log-transformed odds ratio of IPV; the shaded areas are the 95% empirical confidence intervals.**

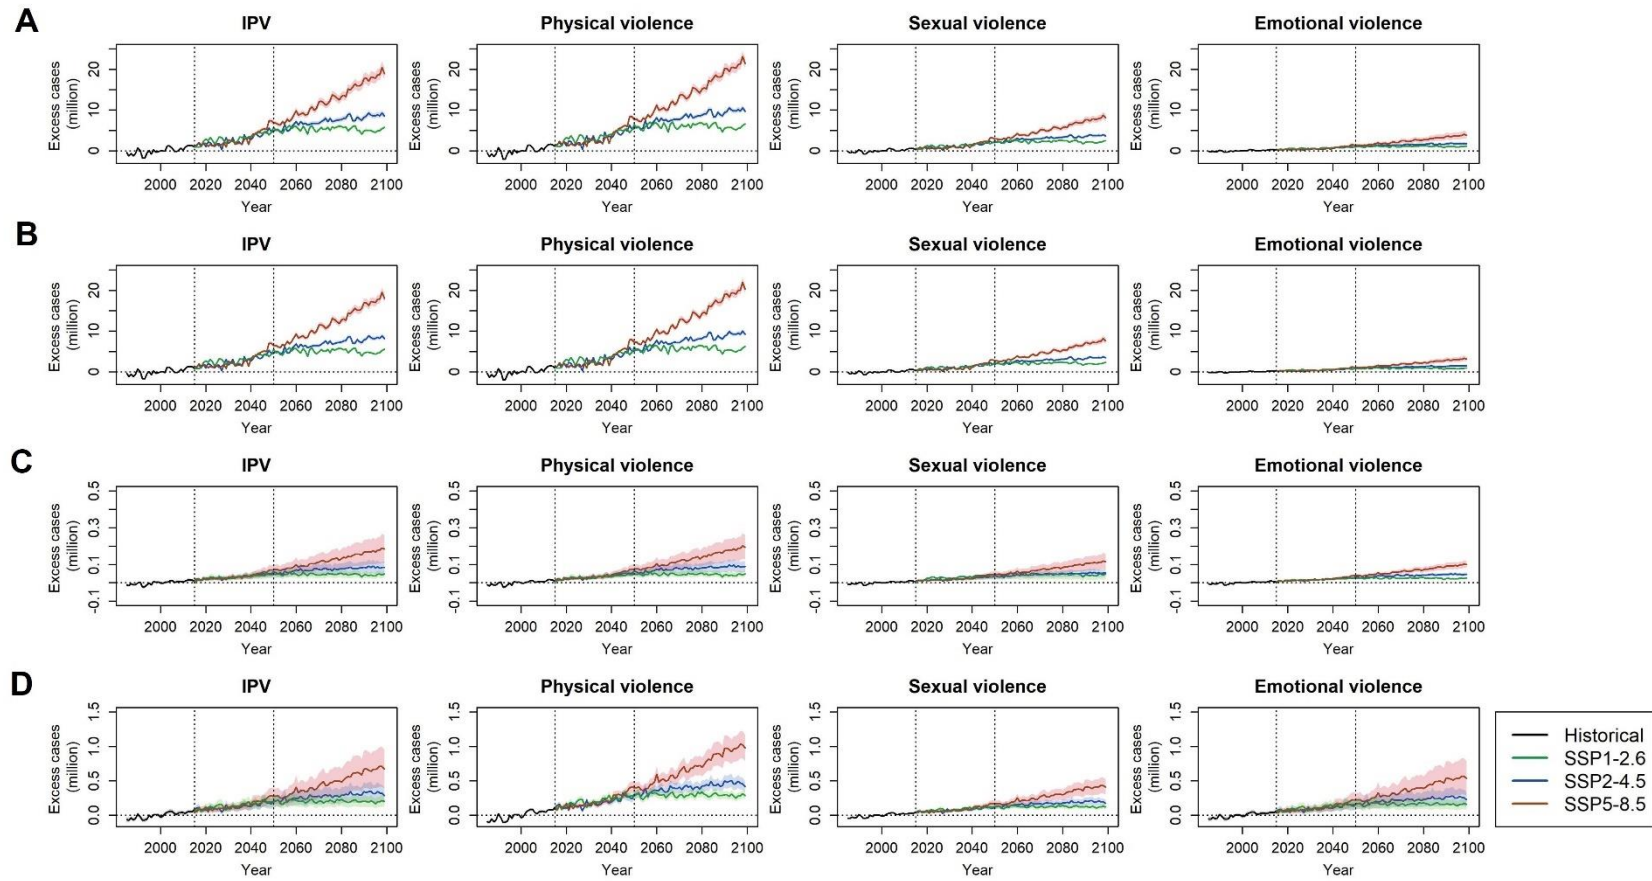

**eFigure 5. Excess IPV cases attributable to climate warming from the baseline period (1985-2014) in 3 South Asian countries under different climate scenarios, under the assumption of no change in population size and structure. A: 3 South Asian countries; B: India; C: Nepal; D: Pakistan. The solid line is the log-transformed odds ratio of IPV; the shaded areas are the 95% empirical confidence intervals.**



**eTable 12.** Projected percentage change of IPV prevalence attributable to climate warming comparing specific decades to the baseline period (1985-2014) in 3 South Asian countries, by country, period, and climate change scenario, considering population changes based on the corresponding SSP assumption.

| Region/<br>countries | Years | Percentage change of IPV prevalence (%) |                   |                   |
|----------------------|-------|-----------------------------------------|-------------------|-------------------|
|                      |       | SSP1-2.6                                | SSP2-4.5          | SSP5-8.5          |
| Total <sup>a</sup>   | 2010s | 0.2 (0.1, 0.4)                          | 0.2 (0.1, 0.4)    | 0.2 (0.1, 0.4)    |
|                      | 2030s | 3.1 (2.8, 3.5)                          | 2.1 (1.9, 2.4)    | 3.2 (2.8, 3.5)    |
|                      | 2050s | 6.5 (6.0, 7.1)                          | 5.6 (5.1, 6.0)    | 7.7 (7.1, 8.4)    |
|                      | 2070s | 5.7 (5.2, 6.2)                          | 7.5 (6.9, 8.2)    | 13.5 (12.4, 14.6) |
|                      | 2090s | 5.4 (4.9, 5.8)                          | 9.0 (8.2, 9.8)    | 19.6 (18.0, 21.3) |
| India                | 2010s | 0.2 (0.1, 0.3)                          | 0.2 (0.1, 0.3)    | 0.2 (0.1, 0.3)    |
|                      | 2030s | 3.6 (3.3, 3.9)                          | 2.4 (2.1, 2.6)    | 3.6 (3.3, 3.9)    |
|                      | 2050s | 7.6 (7.2, 8.1)                          | 6.4 (6.0, 6.8)    | 8.9 (8.3, 9.4)    |
|                      | 2070s | 6.8 (6.3, 7.2)                          | 8.9 (8.4, 9.4)    | 15.9 (14.9, 16.8) |
|                      | 2090s | 6.4 (6.0, 6.8)                          | 10.8 (10.2, 11.5) | 23.4 (22.0, 24.8) |
| Nepal                | 2010s | 0.4 (-0.1, 1.0)                         | 0.4 (-0.1, 1.0)   | 0.4 (-0.1, 1.0)   |
|                      | 2030s | 2.4 (1.3, 3.5)                          | 2.0 (1.1, 2.9)    | 2.7 (1.6, 3.8)    |
|                      | 2050s | 4.4 (2.5, 6.2)                          | 5.5 (3.2, 7.7)    | 6.3 (3.7, 8.8)    |
|                      | 2070s | 3.7 (2.2, 5.1)                          | 6.5 (3.9, 9.1)    | 10.1 (6.0, 14.2)  |
|                      | 2090s | 3.8 (2.3, 5.4)                          | 7.6 (4.5, 10.6)   | 15.0 (8.9, 20.9)  |
| Pakistan             | 2010s | 0.3 (0.1, 0.6)                          | 0.3 (0.1, 0.6)    | 0.3 (0.1, 0.6)    |
|                      | 2030s | 1.0 (0.5, 1.4)                          | 0.9 (0.5, 1.2)    | 1.0 (0.5, 1.5)    |
|                      | 2050s | 1.7 (1.0, 2.4)                          | 1.8 (1.1, 2.6)    | 2.4 (1.5, 3.4)    |
|                      | 2070s | 1.8 (1.1, 2.5)                          | 2.5 (1.5, 3.4)    | 3.8 (2.4, 5.3)    |
|                      | 2090s | 1.8 (1.1, 2.5)                          | 3.0 (1.8, 4.2)    | 5.9 (3.6, 8.2)    |

Note: <sup>a</sup> Total is for the 3 South Asian countries together.

Abbreviation: SSP=Shared Socioeconomic Pathway.

**eTable 13.** Projected percentage change of physical violence, sexual violence and emotional violence prevalence in 3 South Asian countries from the baseline period (1985-2014) under the SSP1-2.6, SSP2-4.5 and SSP5-8.5 scenarios in the 2010s, 2030s, 2050s, 2070s and 2090s, considering population changes based on the corresponding SSP assumption.

| IPV                  | Region/<br>countries | Years | Percentage change of prevalence (%) |                   |                   |
|----------------------|----------------------|-------|-------------------------------------|-------------------|-------------------|
|                      |                      |       | SSP1-2.6                            | SSP2-4.5          | SSP5-8.5          |
| Physical<br>violence | Total <sup>a</sup>   | 2010s | 0.3 (0.2, 0.5)                      | 0.3 (0.2, 0.5)    | 0.3 (0.2, 0.5)    |
|                      |                      | 2030s | 4.3 (3.9, 4.6)                      | 2.9 (2.6, 3.2)    | 4.3 (4.0, 4.7)    |
|                      |                      | 2050s | 9.0 (8.4, 9.6)                      | 7.7 (7.2, 8.2)    | 10.6 (9.9, 11.3)  |
|                      |                      | 2070s | 8.0 (7.4, 8.5)                      | 10.5 (9.8, 11.2)  | 18.7 (17.5, 19.9) |
|                      |                      | 2090s | 7.5 (7.0, 8.1)                      | 12.7 (11.9, 13.6) | 27.4 (25.6, 29.2) |
|                      | India                | 2010s | 0.3 (0.1, 0.4)                      | 0.3 (0.1, 0.4)    | 0.3 (0.1, 0.4)    |
|                      |                      | 2030s | 4.6 (4.2, 4.9)                      | 3.0 (2.8, 3.2)    | 4.6 (4.3, 4.9)    |
|                      |                      | 2050s | 9.7 (9.2, 10.2)                     | 8.1 (7.7, 8.6)    | 11.3 (10.7, 11.9) |
|                      |                      | 2070s | 8.6 (8.1, 9.0)                      | 11.3 (10.7, 11.9) | 20.2 (19.1, 21.2) |
|                      |                      | 2090s | 8.1 (7.7, 8.6)                      | 13.8 (13.1, 14.5) | 29.7 (28.2, 31.3) |
|                      | Nepal                | 2010s | 0.5 (0, 1.1)                        | 0.5 (0, 1.1)      | 0.5 (0, 1.1)      |
|                      |                      | 2030s | 3.1 (1.9, 4.2)                      | 2.6 (1.6, 3.5)    | 3.4 (2.2, 4.6)    |
|                      |                      | 2050s | 5.6 (3.6, 7.6)                      | 7.0 (4.6, 9.4)    | 8.1 (5.3, 10.8)   |
|                      |                      | 2070s | 4.7 (3.1, 6.3)                      | 8.4 (5.5, 11.2)   | 13.0 (8.6, 17.4)  |
|                      |                      | 2090s | 4.9 (3.2, 6.6)                      | 9.8 (6.4, 13)     | 19.2 (12.7, 25.6) |
|                      | Pakistan             | 2010s | 0.5 (0, 1.1)                        | 0.5 (0, 1.1)      | 0.5 (0, 1.1)      |
|                      |                      | 2030s | 3.1 (1.9, 4.2)                      | 2.6 (1.6, 3.5)    | 3.4 (2.2, 4.6)    |
|                      |                      | 2050s | 5.6 (3.6, 7.6)                      | 7.0 (4.6, 9.4)    | 8.1 (5.3, 10.8)   |
|                      |                      | 2070s | 4.7 (3.1, 6.3)                      | 8.4 (5.5, 11.2)   | 13.0 (8.6, 17.4)  |
|                      |                      | 2090s | 4.9 (3.2, 6.6)                      | 9.8 (6.4, 13.0)   | 19.2 (12.7, 25.6) |
| Sexual<br>violence   | Total <sup>a</sup>   | 2010s | 0.4 (0.1, 0.7)                      | 0.4 (0.1, 0.7)    | 0.4 (0.1, 0.7)    |
|                      |                      | 2030s | 4.0 (3.4, 4.5)                      | 2.7 (2.3, 3.1)    | 4.0 (3.5, 4.6)    |
|                      |                      | 2050s | 8.3 (7.4, 9.2)                      | 7.1 (6.3, 7.9)    | 9.8 (8.8, 10.9)   |
|                      |                      | 2070s | 7.4 (6.6, 8.2)                      | 9.8 (8.7, 10.9)   | 17.4 (15.5, 19.2) |
|                      |                      | 2090s | 7.0 (6.2, 7.8)                      | 11.9 (10.5, 13.2) | 25.5 (22.7, 28.3) |
|                      | India                | 2010s | 0.3 (0, 0.5)                        | 0.3 (0, 0.5)      | 0.3 (0, 0.5)      |
|                      |                      | 2030s | 4.1 (3.7, 4.6)                      | 2.7 (2.4, 3.1)    | 4.2 (3.7, 4.6)    |
|                      |                      | 2050s | 8.8 (8.0, 9.6)                      | 7.4 (6.7, 8.1)    | 10.3 (9.3, 11.2)  |
|                      |                      | 2070s | 7.8 (7.1, 8.5)                      | 10.3 (9.4, 11.2)  | 18.4 (16.7, 20)   |
|                      |                      | 2090s | 7.4 (6.7, 8.1)                      | 12.5 (11.4, 13.7) | 27.1 (24.7, 29.5) |
|                      | Nepal                | 2010s | 0.9 (-0.1, 1.8)                     | 0.9 (-0.1, 1.8)   | 0.9 (-0.1, 1.8)   |
|                      |                      | 2030s | 4.1 (2.3, 5.7)                      | 3.4 (2.0, 4.7)    | 4.5 (2.8, 6.2)    |
|                      |                      | 2050s | 7.4 (4.5, 10.2)                     | 9.3 (5.8, 12.6)   | 10.7 (6.7, 14.6)  |
|                      |                      | 2070s | 6.2 (3.9, 8.5)                      | 11.0 (6.9, 15)    | 17.2 (10.8, 23.4) |

|                    |                    |                |                 |                   |                  |                 |
|--------------------|--------------------|----------------|-----------------|-------------------|------------------|-----------------|
| Emotional violence | Pakistan           | 2090s          | 6.5 (4.0, 8.8)  | 12.9 (8.1, 17.5)  | 25.3 (16, 34.5)  |                 |
|                    |                    | 2010s          | 1.1 (0.5, 1.7)  | 1.1 (0.5, 1.7)    | 1.1 (0.5, 1.7)   |                 |
|                    |                    | 2030s          | 2.6 (1.7, 3.4)  | 2.3 (1.7, 3.0)    | 2.7 (1.8, 3.6)   |                 |
|                    |                    | 2050s          | 4.6 (3.4, 5.8)  | 4.9 (3.6, 6.2)    | 6.6 (4.8, 8.3)   |                 |
|                    |                    | 2070s          | 4.9 (3.6, 6.1)  | 6.7 (4.9, 8.4)    | 10.4 (7.7, 13.1) |                 |
|                    | Total <sup>a</sup> | 2090s          | 4.8 (3.6, 6.1)  | 8.2 (6.1, 10.3)   | 16 (11.9, 20.1)  |                 |
|                    |                    | 2010s          | 0.2 (-0.1, 0.4) | 0.2 (-0.1, 0.4)   | 0.2 (-0.1, 0.4)  |                 |
|                    |                    | 2030s          | 1.4 (0.9, 1.8)  | 1.0 (0.6, 1.3)    | 1.4 (0.9, 1.8)   |                 |
|                    |                    | 2050s          | 2.8 (2.1, 3.4)  | 2.4 (1.8, 3.1)    | 3.4 (2.5, 4.2)   |                 |
|                    |                    | 2070s          | 2.5 (1.8, 3.1)  | 3.3 (2.5, 4.2)    | 5.8 (4.4, 7.2)   |                 |
|                    |                    | India          | 2090s           | 2.4 (1.7, 3.0)    | 4.0 (2.9, 5.0)   | 8.5 (6.3, 10.6) |
|                    |                    |                | 2010s           | 0.1 (-0.1, 0.3)   | 0.1 (-0.1, 0.3)  | 0.1 (-0.1, 0.3) |
|                    |                    |                | 2030s           | 1.5 (1.1, 1.9)    | 1.0 (0.7, 1.3)   | 1.5 (1.1, 1.9)  |
|                    |                    |                | 2050s           | 3.2 (2.6, 3.8)    | 2.7 (2.1, 3.2)   | 3.7 (3.0, 4.4)  |
|                    |                    |                | 2070s           | 2.8 (2.3, 3.4)    | 3.7 (3.0, 4.5)   | 6.7 (5.4, 7.9)  |
|                    |                    | Nepal          | 2090s           | 2.7 (2.1, 3.2)    | 4.5 (3.7, 5.4)   | 9.8 (7.9, 11.7) |
|                    |                    |                | 2010s           | 0.5 (0.2, 0.8)    | 0.5 (0.2, 0.8)   | 0.5 (0.2, 0.8)  |
|                    |                    |                | 2030s           | 2.2 (1.7, 2.7)    | 1.9 (1.5, 2.3)   | 2.5 (2, 3.0)    |
|                    |                    |                | 2050s           | 4.1 (3.2, 4.9)    | 5.1 (4.1, 6.1)   | 5.9 (4.7, 7.0)  |
|                    |                    |                | 2070s           | 3.4 (2.7, 4.1)    | 6.1 (4.9, 7.2)   | 9.4 (7.5, 11.3) |
| Pakistan           | 2090s              | 3.6 (2.9, 4.3) | 7.1 (5.7, 8.4)  | 13.9 (11.1, 16.6) |                  |                 |
|                    | 2010s              | 0.4 (0, 0.7)   | 0.4 (0, 0.7)    | 0.4 (0, 0.7)      |                  |                 |
|                    | 2030s              | 0.9 (0.4, 1.4) | 0.8 (0.4, 1.2)  | 0.9 (0.4, 1.5)    |                  |                 |
|                    | 2050s              | 1.6 (0.9, 2.4) | 1.7 (0.9, 2.6)  | 2.3 (1.3, 3.4)    |                  |                 |
|                    | 2070s              | 1.7 (1.0, 2.5) | 2.4 (1.3, 3.4)  | 3.7 (2.0, 5.3)    |                  |                 |
|                    |                    | 2090s          | 1.7 (0.9, 2.5)  | 2.9 (1.6, 4.2)    | 5.7 (3.1, 8.2)   |                 |

Note: <sup>a</sup> Total is for the 3 South Asian countries together.

Abbreviation: SSP=Shared Socioeconomic Pathway.

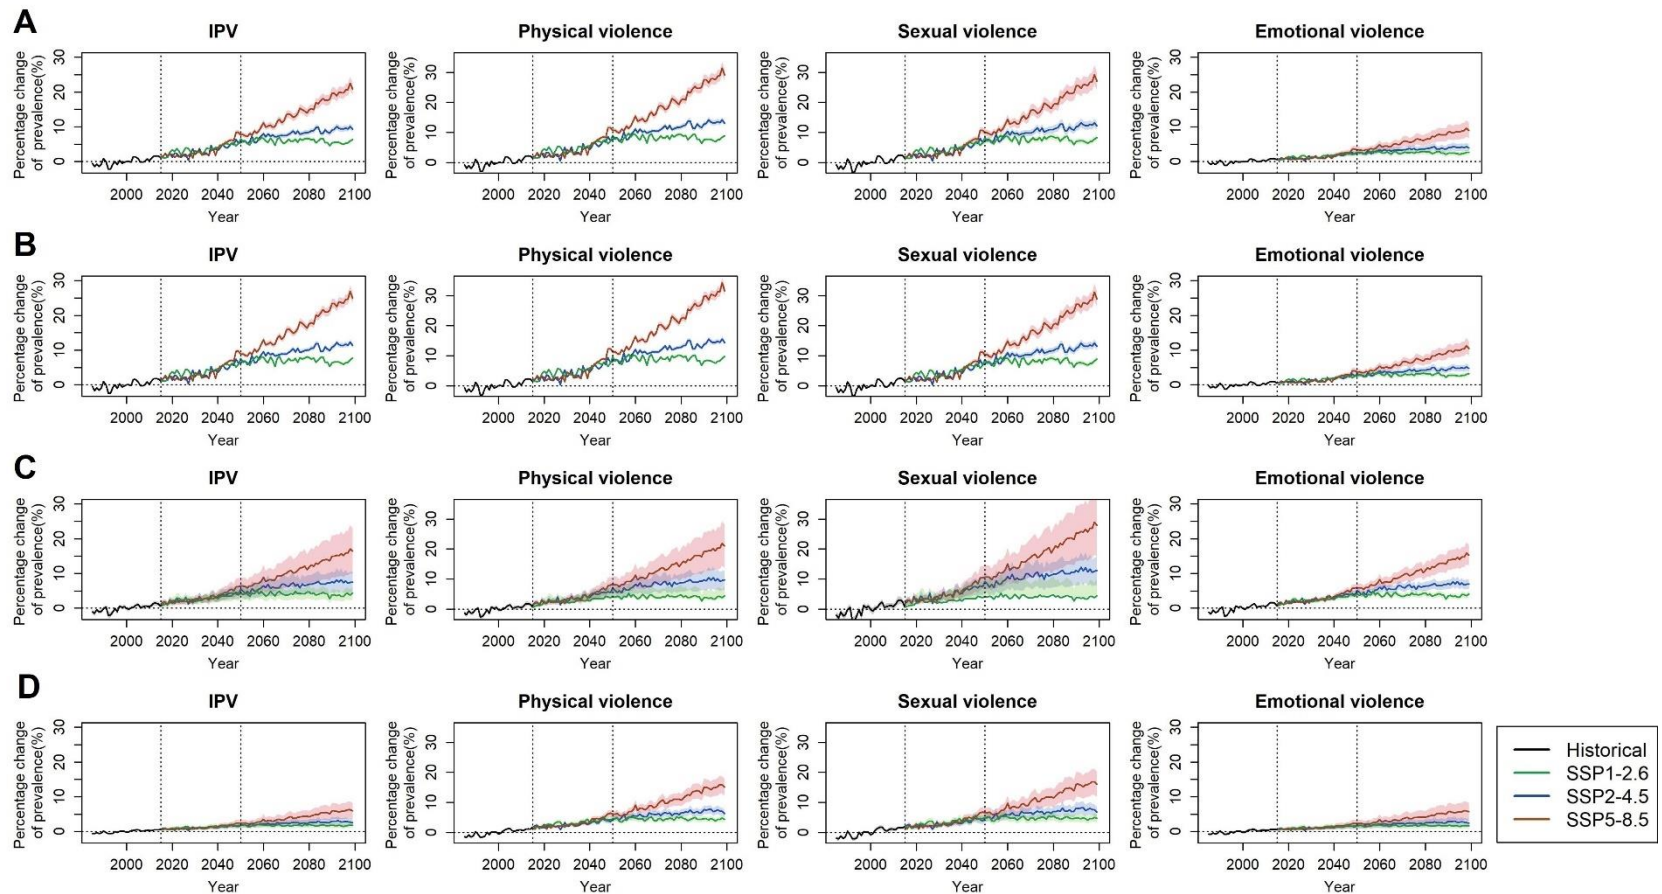

**Figure 6. Projected percentage changes in IPV prevalence attributable to climate warming from the baseline period (1985-2014) in 3 South Asian countries under different climate scenarios, considering population changes based on the corresponding SSP assumption. A: 3 South Asian countries; B: India; C: Nepal; D: Pakistan. The solid line is the log-transformed odds ratio of IPV; the shaded areas are the 95% empirical confidence intervals.**

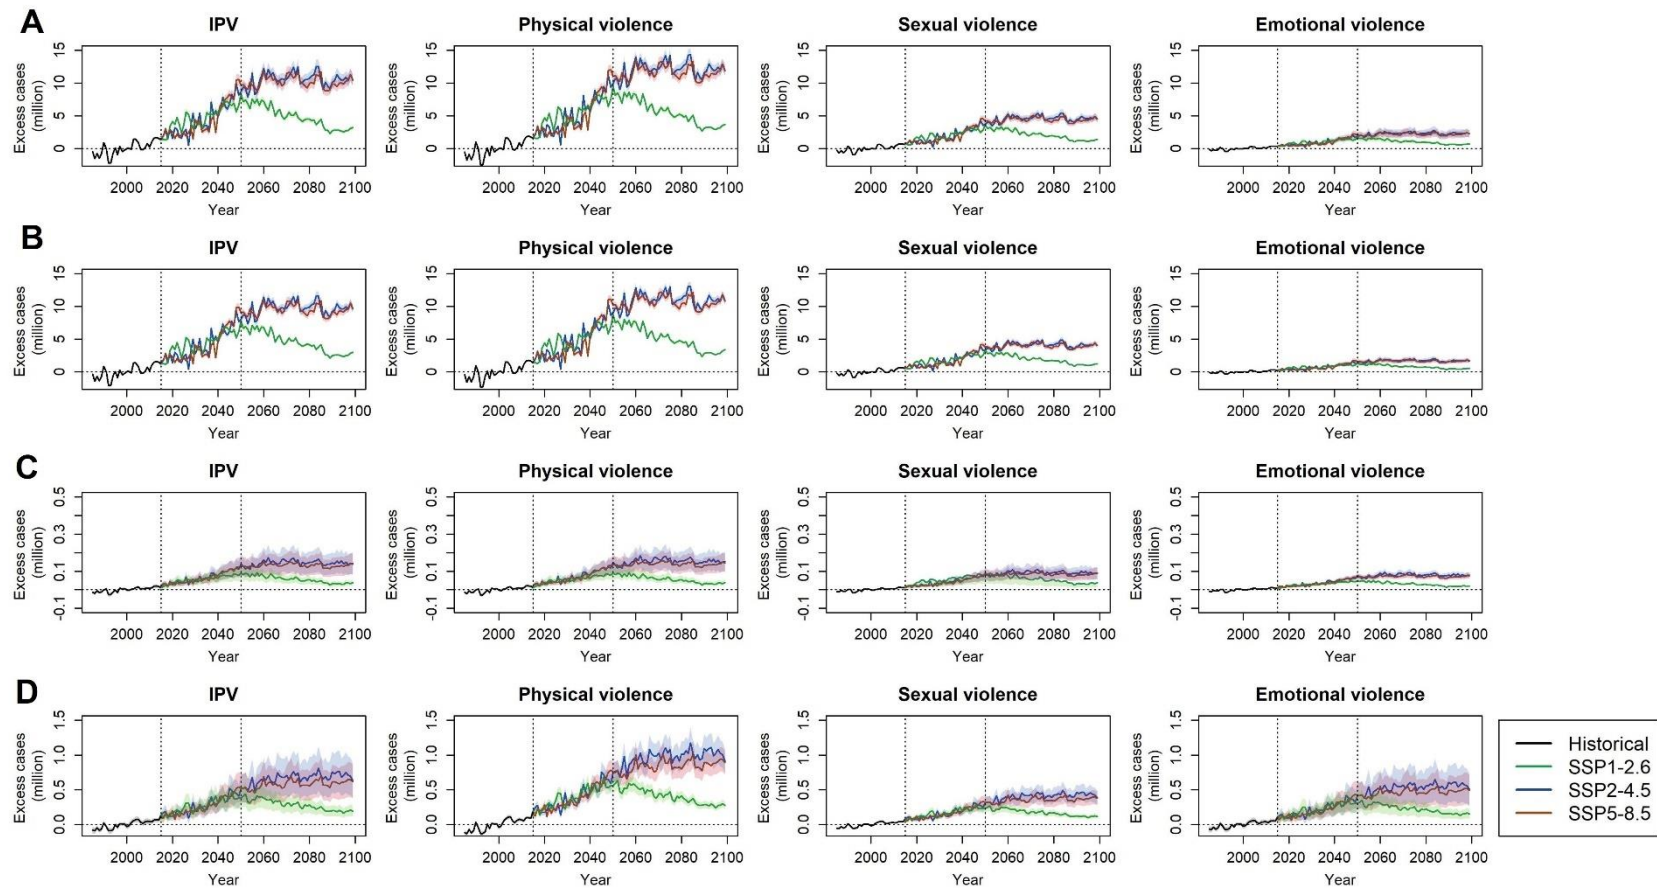

**Figure 7. Excess IPV cases attributable to climate warming from the baseline period (1985-2014) in 3 South Asian countries under different climate scenarios, considering population changes based on the corresponding SSP assumption. A: 3 South Asian countries; B: India; C: Nepal; D: Pakistan. The solid line is the log-transformed odds ratio of IPV; the shaded areas are the 95% empirical confidence intervals.**

## eReferences

1. International RMI. ICF International. The Demographic and Health Surveys (DHS) program. 2022;
2. <https://www.dhprogram.com> IIC. Demographic and Health Surveys Program. accessed Dec 1, 2018. Maryland
3. Vyas S, Kumaranayake L. Constructing socio-economic status indices: how to use principal components analysis. *Health Policy Plan*. Nov 2006;21(6):459-68. doi:10.1093/heapol/czl029
4. Croft TN, Aileen M. J. Marshall, Courtney K. Allen, et al. Guide to DHS Statistics. *Rockville, Maryland, USA: ICF*. 2018;
5. Lee JY, J. Marotzke, G. Bala, L. Cao, S. Corti, J. P. Dunne, F. Engelbrecht, E. Fischer, J. C. Fyfe, C. Jones, A. Maycock, J. Mutemi, O. Ndiaye, S. Panickal, T. Zhou Future Global Climate: Scenario-Based Projections and Near-Term Information. *Climate Change 2021: The Physical Science Basis. Contribution of Working Group I to the Sixth Assessment Report of the Intergovernmental Panel on Climate Change. [Masson-Delmotte, V, P Zhai, A Pirani, S L Connors, C Péan, S Berger, N Caud, Y Chen, L Goldfarb, M I Gomis, M Huang, K Leitzell, E Lonnoy, J B R Matthews, T K Maycock, T Waterfield, OYelekçi, R Yu and B Zhou (eds)] Cambridge University Press In Press*. 2021;
6. Riahi K, Van Vuuren DP, Kriegler E, et al. The Shared Socioeconomic Pathways and their energy, land use, and greenhouse gas emissions implications: An overview. *Glob Environ chang*. 2017;42:153-168.
7. Martínez-Solanas È, Quijal-Zamorano M, Achebak H, et al. Projections of temperature-attributable mortality in Europe: a time series analysis of 147 contiguous regions in 16 countries. *Lancet Planet Health*. Jul 2021;5(7):e446-e454. doi:10.1016/s2542-5196(21)00150-9
8. Runfola D, Anderson A, Baier H, et al. geoBoundaries: A global database of political administrative boundaries. *PLoS One*. 2020;15(4):e0231866.

9. Wilcke RAI, Mendlik T, Gobiet A. Multi-variable error correction of regional climate models. *Clim Change*. 2013;120(4):871-887.
10. Gao J. Data from: Global 1-km Downscaled Population Base Year and Projection Grids Based on the Shared Socioeconomic Pathways, Revision 01. 2020. *Palisades, New York*.
11. Samir K, Lutz W. The human core of the shared socioeconomic pathways: Population scenarios by age, sex and level of education for all countries to 2100. *Glob Environ Chang*. 2017;42:181-192.
12. Chen R, Jiang Y, Hu J, et al. Hourly Air Pollutants and Acute Coronary Syndrome Onset in 1.29 Million Patients. *Circulation*. Jun 14 2022;145(24):1749-1760. doi:10.1161/circulationaha.121.057179
13. Kroll MH, Emancipator K. A theoretical evaluation of linearity. *Clin Chem*. 1993;39(3):405-413.
14. Gasparri A, Guo Y, Sera F, et al. Projections of temperature-related excess mortality under climate change scenarios. *Lancet Planet Health*. Dec 2017;1(9):e360-e367. doi:10.1016/s2542-5196(17)30156-0
15. Yang J, Zhou M, Ren Z, et al. Projecting heat-related excess mortality under climate change scenarios in China. *Nat Commun*. Feb 15 2021;12(1):1039. doi:10.1038/s41467-021-21305-1
16. Sheppard L, Burnett RT, Szpiro AA, et al. Confounding and exposure measurement error in air pollution epidemiology. *Air Qual Atmos Health*. Jun 2012;5(2):203-216. doi:10.1007/s11869-011-0140-9
