# Supplementary material
Source: PubMed Central journal article supplement (PMC10308303)
Supplement: jamapsychiatry-e231958-s002.pdf [file jamapsychiatry-e231958-s002.pdf]

## **Data Sharing Statement**

### **Data**

**Data available:** No
